# Supplementary material
Source: publisher figshare collection journal article supplement (https://acs.figshare.com/ndownloader/files/4653655)
Supplement: Supplementary file 1 [file 4653655]

# Synthesis, radiosynthesis and biological evaluation of new proteasome inhibitors in a tumor targeting approach

*Magali Vivier<sup>\*†</sup>, Maryse Rapp<sup>†</sup>, Janine Papon<sup>†</sup>, Pierre Labarre<sup>†</sup>, Marie-Joséphine Galmier<sup>†</sup>, Jacques  
Sauzière<sup>§</sup>, Jean-Claude Madelmont<sup>\*†</sup>.*

<sup>†</sup>INSERM, UMR 484, Clermont-Ferrand, F-63005, France, Univ. Clermont 1, Laboratoires de Chimie  
Minérale et Analytique, Clermont-Ferrand, F-63001, France, Centre Jean Perrin, F-63011, France.

<sup>§</sup>OTL Pharma, 15 rue de Turbigo, Paris, F-75002, France

\* Authors for correspondence. Phone: (33) 4 73 15 08 00. Fax: (33) 4 73 15 08 01. E-mail:  
mag.viv@free.fr or [madelmont@inserm484.u-clermont1.fr](mailto:madelmont@inserm484.u-clermont1.fr)

## Contents of S.I.:

Formatted

S1. Ratio of injected dose of [<sup>125</sup>I]-12 in B16 tumor to that in blood.

Formatted

S2. Aldehyde derivatives synthesized.

Formatted

S3. Main fragmentations of [M+H]<sup>+</sup> ions from electrospray of aldehyde 12<sup>a</sup>.

Formatted

S4. Synthesis of radiolabelled compound [<sup>125</sup>I]-12.<sup>a</sup>

Formatted

S5. Experimental section

Formatted

S6. Acknowledgments



S1. Ratio of injected dose of [ $^{125}$ I]-12 in B16 tumor to that in blood.

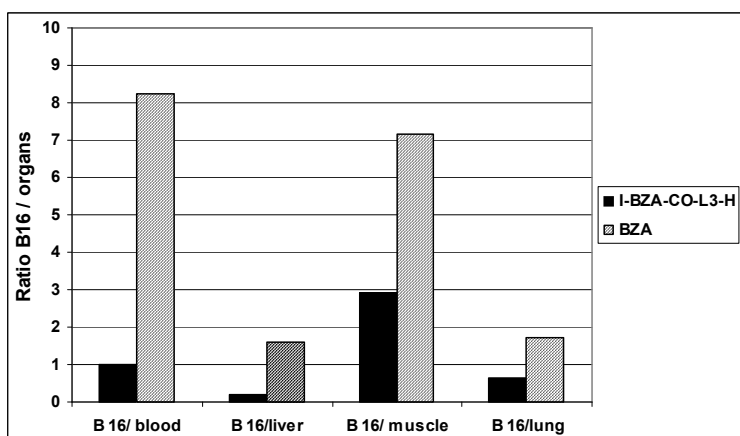

**S2.** Aldehyde derivatives synthesized.

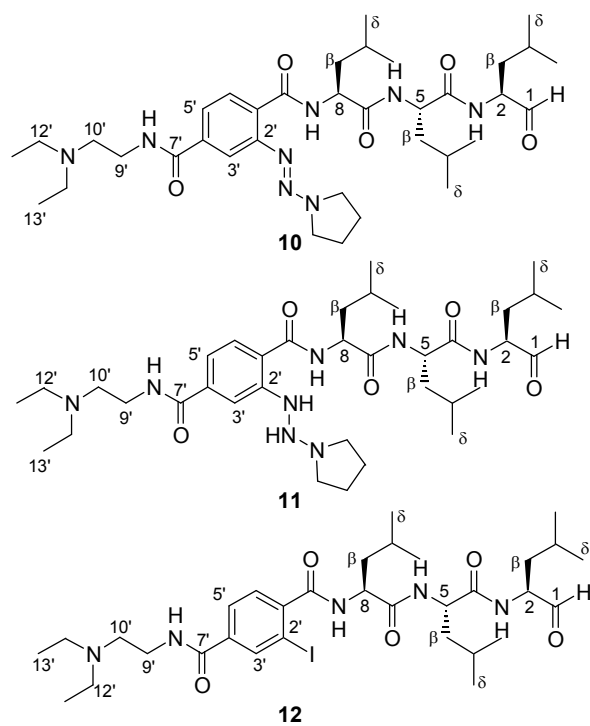

**Deleted:** ¶  
**Figure 1.** Main fragmentations of  $[M+H]^+$  ions

**Deleted:** derived

**Deleted:** from electrospray of aldehyde 12<sup>a</sup>. ¶

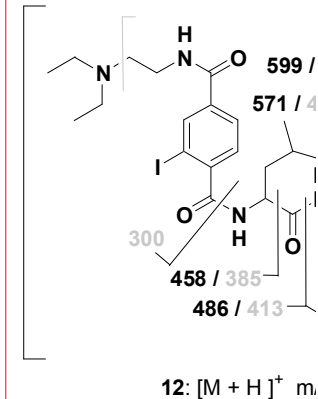

<sup>a</sup> ESI mass spectra were obtained on an ESQUIRE-LC ion trap spectrometer (see E

**Deleted:** c

**Deleted:** xperimental S

**Deleted:** s

**Deleted:** ection). ¶

**Deleted:** —Page Break—

**Deleted:** Figure 2

**Deleted:** t

### S3. Main fragmentations of $[M+H]^+$ ions from electrospray of aldehyde **12**<sup>a</sup>.

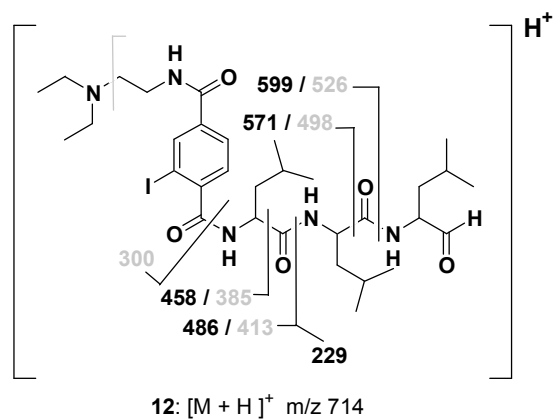

<sup>a</sup> ESI mass spectra were obtained on an ESQUIRE-LC ion trap spectrometer (see Experimental Section).

Deleted: Figure 3. Ratio of

Deleted: the

Deleted: injected dose of  $[^{125}I]$ -12 in B16 tumor

Deleted: and

Deleted: to that in blood.¶

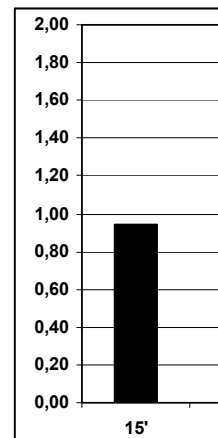

Deleted:

Deleted: ¶

**S4. Synthesis of radiolabelled compound [ $^{125}\text{I}$ ]-12.<sup>a</sup>**

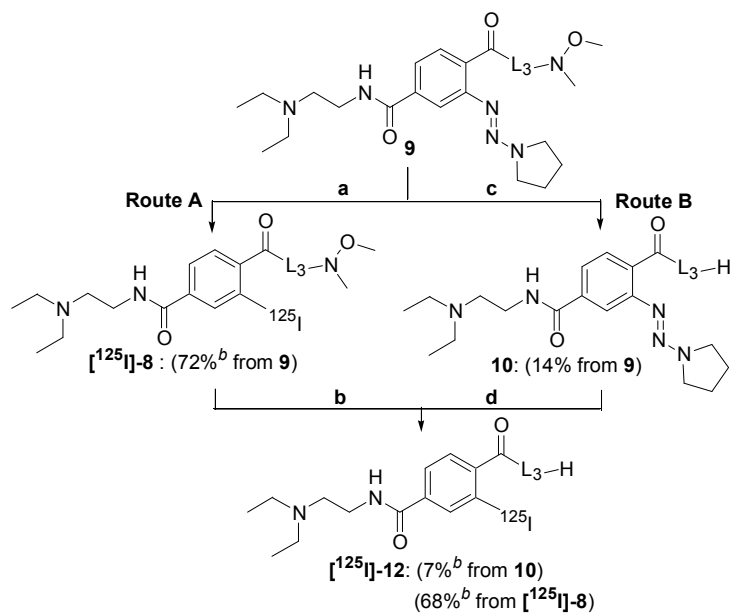

<sup>a</sup>Reagents: (a) [ $^{125}\text{I}$ ]-NaI,  $\text{CH}_3\text{CN}$ ,  $\text{CF}_3\text{COOH}$  (b)  $\text{AlLiH}_4$ , THF,  $-80^\circ\text{C}$ ; (c)  $\text{AlLiH}_4$ , THF,  $-80^\circ\text{C}$ ; (d) [ $^{125}\text{I}$ ]-NaI,  $\text{CH}_3\text{CN}$ ,  $\text{CH}_3\text{SO}_3\text{H}$ . <sup>b</sup>Yield of incorporation of  $^{125}\text{I}$ -iodine.

Deleted: ¶

## S5. Experimental Section

### Chemistry

All reagents and solvents were from commercial suppliers and were used with no further purification.

Tetrahydrofuran (THF) was distilled over sodium-benzophenone. All the other reaction solvents were

anhydrous or commercial HPLC grade, (Carlo Erba Reagenti, Milan, Italy). Iodine-125 in NaOH pH = 7-

11, free from reducing agents s was from Amersham Biosciences. Purity was checked by TLC on

precoated silica gel plates (plastic sheet 60 F<sub>254</sub>, layer thickness 0.25 mm, SDS, Pepin, France),

aluminium oxide plates (60 F<sub>254</sub>, neutral type E, layer thickness 0.20 mm, Merk, Darmstadt, Germany) or

RP-18 plates (RP-18 F<sub>254S</sub>, Merk). Solvent mixture A: DCM/MeOH (98/2%). Solvent mixture B:

H<sub>2</sub>O/CH<sub>3</sub>CN/TFA (40/60/0.1%). Melting points were determined on a Reichert-Jung Koffler apparatus.

Infrared spectra were recorded in KBr pellets or in CCl<sub>4</sub> on an FT Vector 22 instrument ( $\nu$  expressed in

cm<sup>-1</sup>; Bruker, Bremen, Germany, developed in supporting information). Proton and carbon nuclear

magnetic resonance spectra (<sup>1</sup>H and <sup>13</sup>C NMR) were recorded in CDCl<sub>3</sub> or DMSO-*d*<sub>6</sub> on a Bruker AM

200 (4.7 T), or Bruker DRX 500 (11.7 T) spectrometer. Chemical shifts ( $\delta$ ) are reported in parts per

million relative to the internal standard (CH<sub>3</sub>)<sub>3</sub>Si or relative to solvent signals (CDCl<sub>3</sub>,  $\delta$  = 7.26 ppm for

<sup>1</sup>H NMR and  $\delta$  = 77.0 ppm for <sup>13</sup>C NMR or DMSO-*d*<sub>6</sub>,  $\delta$  = 2.49 ppm for <sup>1</sup>H NMR and  $\delta$  = 39.0 ppm for

<sup>13</sup>C NMR). Electrospray ionization mass spectra (ESI-MS) were obtained on an ESQUIRE-LC

spectrometer in positive mode (solvent: CH<sub>3</sub>CN or CH<sub>3</sub>CN/H<sub>2</sub>O 1:1; Bruker). Main fragmentations of

[M+H]<sup>+</sup> ions from electrospray of synthesized derivatives were determined. HPLC chromatograms were

obtained on a Hewlett Packard series 1100 instrument; RP18 column, solvent A: H<sub>2</sub>O, NH<sub>4</sub>OH 0.2 %, s

solvent B: MeOH, NH<sub>4</sub>OH 0.2%, method: gradient 30% of B (5 min) to 80% of B (15 min), flow rate

0.5 mL/min, detection at 254 nm or by flow scintillation analyzer (FLO-ONE; Packard).

The amino acids required for the preparation of inhibitors **8**, **9**, **10**, **11** and **12** were synthesized by

standard peptide chemistry methods and (or) literature synthesis.

Deleted: .

Deleted: .

Deleted: HPLC

Deleted: s

Deleted: Compound purity

Deleted: ;

Deleted: ;

Deleted: ;

Deleted: with

Deleted: performed

Deleted: s

Deleted: spectrometre

Deleted: -

Deleted: derived

Deleted: have been

Deleted: r

Deleted: ;

Deleted: ;

Deleted: ;

Deleted: F

Deleted: ;

Deleted: F

Deleted: S

Deleted: A

Deleted: s

Deleted: /





## General method A

### (E)-dimethyl 2-(pyrrolidin-1-yl)diacetyltetraphthalate (2)

$^1\text{H}$  NMR ( $\text{CDCl}_3$ , 200 MHz): 2.01 (ma, 4H, H8), 3.66 (ma, 2H, H7), 3.87 (s, 3H,  $\text{CH}_3$ ), 3.9 (m, 5H, H7 and  $\text{CH}_3$ ), 7.61 (d, 1H,  $J = 8$  Hz, H6), 7.77 (dd, 1H,  $J = 8$  Hz and  $J = 2$  Hz, H5), 8.07 (d, 1H,  $J = 2$  Hz, H3);  $^{13}\text{C}$  NMR ( $\text{CDCl}_3$ , 50.3 MHz): 23.48 (C8), 46.49, 51.09 (C7), 52.09, 52.22 ( $\text{CH}_3$ ), 120.28 (C3), 124.99 (C5), 129.11 (C6), 129.84 (C1), 132.65 (C4), 150.13 (C2), 166.49, 168 (C=O); SM  $m/z = 292.22$   $[\text{M}+\text{H}]^+$ ; anal. ( $\text{C}_{14}\text{H}_{17}\text{N}_3\text{O}_4$ )  $\text{C}_8\text{H}_8\text{N}_2$ .

## General method B

### (E)-methyl 4-((2-(diethylamino)ethyl)carbamoyl)-2-(pyrrolidin-1-yl)diacetylbenzoate (3)

$^1\text{H}$  NMR ( $\text{CDCl}_3$ , 200 MHz): 0.98 (t, 6H,  $J = 7$  Hz, H13); 2.11 (m, 4H, H pyrrolidine); 2.56 (q, 4H,  $J = 6$  Hz, H12); 2.65 (t, 2H,  $J = 8$  Hz, H10); 3.58 (q, 2H,  $J = 8$  Hz, H9); 3.76 (t, 2H,  $J = 6$  Hz, N- $\text{CH}_2$  pyrrolidine); 3.92 (s, 3H,  $\text{OCH}_3$ ); 4.05 (t, 2H,  $J = 6$  Hz, N- $\text{CH}_2$  pyrrolidine); 7.82 (d, 1H,  $J = 8$  Hz, H5); 8.23 (s, 1H, H3); 8.37 (d, 1H,  $J = 8$  Hz, H6); 9.59 (ma, 1H, H8);  $^{13}\text{C}$  NMR ( $\text{CDCl}_3$ , 50.3 MHz): 11.4 (C13); 23.6 and 23.9 (C pyrrolidine); 37.9 (C9), 46.8 and 47.3 (C12); 48.33 (N- $\text{CH}_2$  pyrrolidine); 51.3 (N- $\text{CH}_2$  pyrrolidine); 52.5 (C10); 52.9 ( $\text{OCH}_3$ ); 112.0 (C2); 118.3 (C3); 120.5 (C1); 125.3 (C5); 129.9 (C4); 131.5 (C6); 166.0 and 167.0 (C7 and C=O); SM  $m/z = 376.24$   $[\text{M}+\text{H}]^+$ ; anal. ( $\text{C}_{19}\text{H}_{29}\text{N}_5\text{O}_3$ )  $\text{C}_8\text{H}_8\text{N}_2$ .

## General method C

### Methyl 4-((2-(diethylamino)ethyl)carbamoyl)-2-iodobenzoate (4)

$^1\text{H}$  NMR ( $\text{CDCl}_3$ , 200 MHz): 1.08 (t, 6H,  $J = 8$  Hz, H13), 2.66 (q, 4H,  $J = 8$  Hz, H12), 2.76 (t, 2H,  $J = 6$  Hz, H10), 3.56 (q, 2H,  $J = 6$  Hz, H9), 3.91 (s, 3H,  $\text{CH}_3$ ), 6.92 (ma, 1H, H8), 7.44 (d, 1H,  $J = 8$  Hz, H6); 8.01 (dd, 1H,  $J = 8$  Hz et  $J = 2$  Hz, H5); 8.48 (d, 1H,  $J = 2$  Hz, H3);  $^{13}\text{C}$  NMR ( $\text{CDCl}_3$ , 50.3 MHz): 11.08 (C13), 36.9 (C9), 46.74 (C12), 51.31 (C10); 52.51 ( $\text{CH}_3$ ), 92.13 (C2), 127.97 (C6), 129.25 (C5), 132.26 (C4), 140.78 (C3), 145.97 (C1), 164.88 (C7), 168.67 (C=O); SM  $m/z = 405.25$   $[\text{M}+\text{H}]^+$ .

## General method D

Deleted: M... [1]  
Deleted: é...é...é...é [2]  
Deleted: To a solution of dimethyl... [3]  
Deleted: ;  
Deleted: ; 61.  
Deleted: ;  
Deleted: 8 mmol  
Deleted: ;  
Deleted: ; 12.  
Deleted: ;  
Deleted: 90 g) in water (100 mL) [4]  
Deleted: under high agitation  
Deleted: for 30 min. at 0 °C und... [5]  
Deleted: solution of  
Deleted: solution of  
Deleted: nitrite de  
Deleted: sodium nitrite (1.  
Deleted: ;  
Deleted: 3 c  
Deleted: é  
Deleted: q  
Deleted: ;  
Deleted: ; 81.  
Deleted: ;  
Deleted: 2 mmol  
Deleted: ;  
Deleted: ; 5.  
Deleted: ;  
Deleted: 56 g) in 20 mL of water [6]  
Deleted: and t  
Deleted: the mixture was stirred [7]  
Deleted: and then were added  
Deleted: 8 mL of pyrrolidine (1.  
Deleted: ;  
Deleted: 5 eq  
Deleted: ;  
Deleted: ; 92.  
Deleted: ;  
Deleted: 7 mmol) and 12 mL of [8]  
Deleted: y  
Deleted: de  
Deleted: 1N  
Deleted: at 0°C were then added [9]  
Deleted: and  
Deleted: ;  
Deleted: basified at  
Deleted: made alkaline to pH {... [10]  
Deleted: x  
Deleted: 100 mL). The organ... [11]  
Deleted: ;  
Deleted: 79 g of compound 2 (yield 99.

#### Lithium 4-((2-(diethylamino)ethyl)carbamoyl)-2-iodobenzoate (5)

$^1\text{H}$  NMR ( $\text{CDCl}_3$ , 200 MHz): 1.08 (t, 6H,  $J = 8$  Hz, H13), 2.66 (m, 4H, H12), 2.76 (m, 6H, H10, H9), 6.92 (ma, 1H, H8), 7.2 (d, 1H,  $J = 8$  Hz, H6); 7.8 (d, 1H,  $J = 8$  Hz, H5); 8.29 (s, 1H, H3).  $^{13}\text{C}$  NMR ( $\text{CDCl}_3$ , 50.3 MHz): 11.0 (C13), 36.9 (C9), 46.9 (C12), 51.4 (C10); 93.1 (C2), 131.9 (C6), 130.1 (C5), 141.3 (C4), 140.78 (C3), 147.3 (C1), 165.5 (C7), 168.8 (C=O). IR (KBr):  $\nu_{\text{NH}}$  3422  $\text{cm}^{-1}$ ,  $\nu_{\text{CH}}$  2972  $\text{cm}^{-1}$ ,  $\nu_{\text{CO}}$  1608  $\text{cm}^{-1}$ ; SM  $m/z = 391.24$   $[\text{M}+\text{H}]^+$ .

#### Lithium (E)-4-((2-(diethylamino)ethyl)carbamoyl)-2-(pyrrolidin-1-yl)benzoate (6)

The lithium salt **6** was synthesized according to method **D** with compound **3** (1 eq, 5.6 mmol; 2.09 g) in THF (100 mL). The reaction mixture was then evaporated under reduced pressure and the crude product was washed with acetone and diethylether to give 2.05 g of compound **6** (yield: 100%); white solid; mp > 200°C, TLC R<sub>f</sub> 0.6 (RP-18, H<sub>2</sub>O/CH<sub>3</sub>CN/TFA 40:60:0.1 %);  $^1\text{H}$  NMR ( $\text{CDCl}_3$ , 200 MHz): 0.89 (t, 6H,  $J = 8$  Hz, H13), 2.05 (ma, 4H, H pyrrolidine), 2.49 (m, 6H, H11 and H12); 3.41 (m, 2H, H9); 3.72 (ma, 2H, N-CH<sub>2</sub> pyrrolidine); 4.01 (ma, 2H, N-CH<sub>2</sub> pyrrolidine); 7.65 (d, 1H,  $J = 8$  Hz, H); 7.96 (d, 1H,  $J = 8$  Hz, H); 8.02 (s, 1H, H3), 9.43 (ma, H8).  $^{13}\text{C}$  NMR ( $\text{CDCl}_3$ , 50.3 MHz): 9.72 (C13); 21.51 and 21.97 (C pyrrolidine); 35.85 (C9), 44.76 and 45.53 (C12); 49.69 (N-CH<sub>2</sub> pyrrolidine); 50.31 (N-CH<sub>2</sub> pyrrolidine); 51.50 (C10); 115.84 (C2); 123.69 (C3); 123.91 (C1); 127.86 (C5); 142.34 (C4); 146.13 (C6); 163.92 and 166.6 (C7 and C=O). IR (KBr):  $\nu_{\text{NH}}$  3235  $\text{cm}^{-1}$ ,  $\nu_{\text{CH}}$  2965  $\text{cm}^{-1}$ ,  $\nu_{\text{CO}}$  1632  $\text{cm}^{-1}$ . SM  $m/z = 362.14$   $[\text{M}+\text{H}]^+$ ; anal. ( $\text{C}_{18}\text{H}_{26}\text{LiN}_5\text{O}_3$ , 1.3 H<sub>2</sub>O) C, H, N.

#### N<sup>4</sup>-(2-(diethylamino)ethyl)-2-iodo-N<sup>1</sup>-(1-(1-(methoxy(methyl)amino)-4-methyl-1-oxopentan-2-ylamino)-4-methyl-1-oxopentan-2-yl)terephthalamide (8)

$^1\text{H}$  NMR ( $\text{CDCl}_3$ , 500 MHz)  $\delta$ : 0.9 (m, 12H, H $\delta$ ); 1.41 (t,  $J = 6.9$  Hz, 6H, H13'); 1.52 (m, 6H, H $\gamma$  and H $\beta$ ); 3.16 (s, 3H, NCH<sub>3</sub>); 2.21 (m, 4H, H12'); 2.31 (m, 2H, H10'); 3.79 (s, 3H, OCH<sub>3</sub>); 3.87 (m, 2H, H9'); 4.77 (m, 2H, H5 and H8); 5.11 (m, 1H, H2); 7.26 (m, 1H, H3); 7.40 (d, 1H,  $J = 8.0$  Hz, H6'); 7.77 (d,  $J = 8$  Hz, 1H, H5'); 8.13 (m, 1H, H6); 8.22 (s, 1H, H3'); 8.62 (ma, 1H, H9);  $^{13}\text{C}$  NMR ( $\text{CDCl}_3$ , 50.3

Deleted: é...é...de lithium ... [14]  
Deleted: To a solution of lithiu ... [15]  
Deleted: ,  
Deleted: 12 mmol  
Deleted: ;  
Deleted: ; 859.  
Deleted: ,  
Deleted: 1 mg) in THF (3.5 m ... [16]  
Deleted: afford  
Deleted: give 842 mg of 5 (yic ... [17]  
Deleted: R<sub>f</sub>  
Deleted:  
Deleted: : 0.  
Deleted: ,  
Deleted: 67 (RP18  
Deleted: ;  
Deleted: ; H<sub>2</sub>O/CH<sub>3</sub>CN/TFA 40:60:0.  
Deleted: ,  
Deleted: 1 %)  
Deleted: ;  
Deleted: ;  
Deleted: , ... [18]  
Deleted: ... [19]  
Deleted: , ... [20]  
Deleted: é...é...é...de lithium ... [21]  
Deleted: i...é...é...é...é...é...é... [22]  
Deleted:  
Deleted: , ... [23]  
Deleted:  
Deleted: , ... A... [24]  
Deleted: é...é...é...é...é...é... [25]  
Deleted: The iodination of We ... [26]  
Deleted: é  
Deleted: q, 0.  
Deleted: ,  
Deleted: 51 mmol, 380 mg) w ... [27]  
Deleted: following  
Deleted: using method C. ¶ ... [28]  
Deleted: afford  
Deleted: give 290 mg of 11 (y ... [29]  
Deleted: R<sub>f</sub>  
Deleted: R<sub>f</sub>  
Deleted:  
Deleted: : 0.  
Deleted: ,  
Deleted: 4 (a  
Deleted: A  
Deleted: lumina  
Deleted: e  
... [30]



(CDCl<sub>3</sub>: 50.3 MHz): 10.71 (C13'), 21.60, 22.01, 22.33, 22.78, 22.83, 23.30 (Cδ), 23.93, 23.57 (C12'), 24.62, 24.78, 24.84 (Cγ), 32.18 (NCH3), 37.46 (Cpyrr), 41.06, 41.79 (Cβ), 46.9 (C10'), 47.4 (Cpyrr), 47.55 (C2), 51.8 (C9'), 51.88 (C5 or C8), 51.9 (C12'), 51.98 (C5 or C8), 61.58 (OCH<sub>3</sub>), 116.03 (C3'), 122.75 (C5'), 127.87 (C2'), 131.62 (C6'), 136.51 (C1'), 149.04 (C4'), 166.08, 166.98 (C1, C4 and C7), 171.45, 171.77 (C10 and C7'); IR (KBr): ν<sub>NH</sub> 3286 cm<sup>-1</sup>, ν<sub>CH</sub> 2957 cm<sup>-1</sup>–ν<sub>CO</sub> 1638 cm<sup>-1</sup>; M.S. *m/z* = 744.61 [M+H]<sup>+</sup>; anal. (C<sub>38</sub>H<sub>65</sub>N<sub>9</sub>O<sub>6</sub>, 0.1 H<sub>2</sub>O) C, H, N.

Deleted: .....P  
.....U.....  
.....et..... [36]

Deleted:  
Deleted: ;.....A..... [37]

Deleted: M

Deleted: .....é.....é.....é..... [38]

## General method F

(E)-N<sup>4</sup>-(2-(diethylamino)ethyl)-N<sup>1</sup>-(4-methyl-1-(4-methyl-1-(4-methyl-1-oxopent-2-ylamino)-1-oxopent-2-ylamino)-1-oxopent-2-yl)-2-(pyrrolidin-1-yl)terephthalamide (10)

A solution of lithium aluminium hydride in ether (1M/THF, 1.1 eq, 2.2 mmol) was added dropwise at –80 °C under a nitrogen atmosphere to a solution of **9** (1 eq, 2.01 mmol, 1.49 g) in anhydrous THF (5 mL). The mixture was stirred for 90 min and was then allowed to warm to 0 °C. The reaction was quenched by adding water (20 mL) and excess lithium aluminium hydride was eliminated by the Mihailovic method. The resulting crude reaction mixture was extracted with CH<sub>2</sub>Cl<sub>2</sub> (3 × 50 mL). The combined organic layers were dried over MgSO<sub>4</sub>, concentrated under vacuum and purified by flash chromatography (aluminium oxide, CH<sub>2</sub>Cl<sub>2</sub>/gradient of MeOH 2 up to 5 %) to give 942.6 mg of **10** (yield: 68%): white solid; TLC R<sub>f</sub>: 0.4 (alumina, CH<sub>2</sub>Cl<sub>2</sub> / MeOH 95:5); <sup>1</sup>H NMR (CDCl<sub>3</sub>: 200 MHz): 0.84 (m, 18H, H<sub>γ</sub>), 0.95 (t, 6H, *J* = 8 Hz, H13'), 1.43 (m, 3H, H8β and H8γ), 1.51 (m, 3H, H5β and H5γ), 1.69 (m, 3H, H2β and H2γ), 2.03 (m, 4H, Hpyrr), 2.52 (q, *J* = 6 Hz, 4H, H12'), 2.60 (t, *J* = 6 Hz, 4H, H10'), 3.52 (m, 2H, H9'), 3.67 (m, 2H, Hpyrr), 3.89 (m, 2H, Hpyrr), 4.32 (m, 1H, H8), 4.64 (m, 1H, H5), 4.84 (m, 1H, H2), 7.62 (m, 1H, H3), 7.69 (m, 1H, H6), 7.70 (m, 1H, H9), 7.58 (d, 1H, *J* = 8 Hz, H5'), 7.98 (s, 1H, H3'), 8.25 (d, 1H, *J* = 8 Hz, H6'), 9.43 (s, 1H, H1); 9.56 (ma, 1H, H8'); <sup>13</sup>C NMR (CDCl<sub>3</sub>: 50.3 MHz): 10.84 (C13'), 21.61, 21.63, 21.91, 22.18, 22.28, 22.61 (Cδ), 22.73, 23.01 (C12'), 23.49, 23.87, 24.60 (Cγ), 37.21 (Cpyrr), 40.63, 40.86 (Cβ), 46.88 (C10'), 47.31 (Cpyrr), 51.65 (C2),

Deleted: .....é.....under  
é.....then .....at .....the .....tion...  
of.....exceed.....of .....X.....was .....afford  
.....R<sub>f</sub> [39]

Deleted:  
Deleted: .....A.....e.....et  
.....et.....et.....P.....  
.....T..... [40]

51.79 (C9'), 51.92 (C5 or C8), 51.98 (C5 or C8), 57.21 (C12'), 116.33 (C3'): 122.70 (C5'): 127.91 (C6'): 131.37 (C1'): 136.31 (C4'): 148.83 (C2'): 165.73, 167.11 (C10 and C7'), 172.19 (C4): 172.38 (C7), 200.05 (C1); IR (KBr):  $\nu_{\text{NH}}$  3450  $\text{cm}^{-1}$ ,  $\nu_{\text{CH}}$  2965  $\text{cm}^{-1}$ ,  $\nu_{\text{CO}}$  1630  $\text{cm}^{-1}$ ; SM  $m/z$  = 785.7  $[\text{M}+\text{H}]^+$ ; anal. (C<sub>36</sub>H<sub>60</sub>N<sub>8</sub>O<sub>5</sub>, 0.7 H<sub>2</sub>O) C, H, N.

Deleted: .....U.....U.....et  
[41]

Deleted:

Deleted: .....Anal..., [42]

**N<sup>4</sup>-(2-(diethylamino)ethyl)-N<sup>1</sup>-(4-methyl-1-(4-methyl-1-(4-methyl-1-oxopentan-2-ylamino)-1-oxopentan-2-ylamino)-1-oxopentan-2-yl)-2-(pyrrolidin-1-yl-hydrazino)terephthalamide (11)**

Deleted: é...é...é...é...é... [43]

The reduction of Weinreb amide **8** (1 eq, 1.38 mmol, 1.03 g) was achieved using method F. The reaction was quenched by adding water (20 mL) and excess lithium aluminium hydride was eliminated by the Mihailovic method. The resulting crude reaction mixture was extracted with CH<sub>2</sub>Cl<sub>2</sub> (3 × 50 mL). The combined organic layers were dried over MgSO<sub>4</sub> and the product was isolated by recrystallization from diethyl ether to give 0.67 g of **11** (yield: 70%): yellow solid; TLC R<sub>f</sub> 0.3 (alumina, CH<sub>2</sub>Cl<sub>2</sub> / MeOH 95:5); <sup>1</sup>H NMR (CDCl<sub>3</sub>, 200 MHz): 0.9 (m, 24H, H<sub>γ</sub> and H13'), 1.6 (m, 9H, H<sub>β</sub> and H<sub>γ</sub>), 2.05 (m, 4H, H<sub>pyrr</sub>), 2.54 (q,  $J$  = 6 Hz, 4H, H12'), 2.61 (t,  $J$  = 6 Hz, 4H, H10'), 3.60 (m, 2H, H9'), 3.71 (m, 2H, H<sub>pyrr</sub>), 3.90 (m, 2H, H<sub>pyrr</sub>), 4.31 (m, 1H, H8), 4.66 (m, 1H, H5), 4.91 (m, 1H, H2), 7.70 (m, 1H, H3), 7.80 (m, 1H, H6), 7.85 (m, 1H, H9), 7.88 (d, 1H,  $J$  = 8 Hz, H5'), 8.01 (s, 1H, H3'), 8.25 (d, 1H,  $J$  = 8 Hz, H6'), 9.60 (s, 1H, H1), 9.65 (ma, 1H, H8'); <sup>13</sup>C NMR (CDCl<sub>3</sub>, 50.3 MHz): 8.44 (C13'), 21.57, 21.80, 21.96, 22.25, 22.32, 22.84 (C<sub>δ</sub>), 23.09 (C12'), 23.88, 24.78, 24.87 (C<sub>γ</sub>), 37.61 (C<sub>pyrr</sub>), 40.83, 41.19, 41.75 (C<sub>β</sub>), 47.24 (C10'), 47.68 (C<sub>pyrr</sub>), 48.03 (C2), 50.79 (C9'), 51.80 (C5 or C8), 52.18 (C5 or C8), 57.27 (C12'), 115.86 (C3'): 122.63 (C5'): 126.91 (C6'): 131.31 (C1'): 137.08 (C4'): 149.31 (C2'): 166.78, 167.18 (C10 and C7'), 171.47 (C4): 172.17 (C7), 199.53 (C1); IR (KBr):  $\nu_{\text{NH}}$  3470  $\text{cm}^{-1}$ ,  $\nu_{\text{CH}}$  2950  $\text{cm}^{-1}$ ,  $\nu_{\text{CO}}$  1645  $\text{cm}^{-1}$ ; SM  $m/z$  = 687.49  $[\text{M}+\text{H}]^+$ ; anal. (C<sub>36</sub>H<sub>62</sub>N<sub>8</sub>O<sub>5</sub>, 2.5 HCl, 3.5 H<sub>2</sub>O) C, H, N.

Deleted: é...é...é...following ...the addition of...exceed ...of...x...i...afford  
...R<sub>f</sub> [44]

Deleted:

Deleted: .....A...e...; .....et .....et  
.....P... .....et .....  
.....P... .....et .....  
.....et [45]

Deleted:

Deleted: .....A....., [46]

Deleted: é...é...é...é...é... [47]

**N<sup>4</sup>-(2-(diethylamino)ethyl)-2-iodo-N<sup>1</sup>-(4-methyl-1-(4-methyl-1-(4-methyl-1-oxopentan-2-ylamino)-1-oxopentan-2-ylamino)-1-oxopentan-2-yl)terephthalamide (12)**

$^1\text{H}$  NMR ( $\text{CDCl}_3$ ; 500 MHz)  $\delta$ : 0.90 (m, 12H, H $\delta$ ); 1.19 (t,  $J$  = 8 Hz, 6H, H13'); 1.68 (m, 6H, H $\gamma$  and H $\beta$ ); 2.86 (m, 4H, H12'); 2.96 (m, 2H, H10'); 3.62 (m, 2H, H9'); 4.37 (m, 1H, H8); 4.57 (m, 1H, H5); 4.79 (m, 1H, H2); 7.34 (m, 1H, H6'); 7.41 (m, 1H, H9); 7.52 (m, 1H, H6); 7.69 (d,  $J$  = 8 Hz, 1H, H5'); 7.79 (m, 1H, H3); 8.16 (s, 1H, H3'); 9.48 (s, 1H, H1);  $^{13}\text{C}$  NMR ( $\text{CDCl}_3$ ; 50.3 MHz): 10.43 (C13'), 21.66, 21.79, 22.10, 22.20, 22.74, 23.02 (C $\delta$ ), 24.64, 24.79, 24.94 (C $\gamma$ ), 37.31 (C9'), 40.76, 40.9, 41.5 (C $\beta$ ), 47.51 (C12'), 51.24 (C5 or C8), 52.59 (C5 or C8), 53.37 (C10'), 57.33 (C2), 92.61 (C2'); 127.09 (C5'), 127.51 (C6'), 128.03 (C3'), 136.30 (C4'), 138.83 (C1'), 165.52, 168.99 (C1, C4 and C7), 172.28, 172.37 (C10 and C7'); SM  $m/z$  = 714.3  $[\text{M}+\text{H}]^+$ ; anal. ( $\text{C}_{32}\text{H}_{52}\text{IN}_5\text{O}_5$ , HCl, 1  $\text{H}_2\text{O}$ )  $\text{C}_3\text{H}_7\text{N}$ .

**$\text{N}^4$ -(2-(diethylamino)ethyl)-2-iodo- $\text{N}^1$ -(1-(1-(1-methoxy(methyl)amino)-4-methyl-1-oxopentan-2-ylamino)-4-methyl-1-oxopentan-2-ylamino)-4-methyl-1-oxopentan-2-yl)terephthalamide ( $[\text{I}^{125}\text{I}]\text{-8}$ )**

To a solution of compound **9** (10  $\mu\text{mol}$ , 7.4 mg) in acetonitrile ( $\text{CH}_3\text{CN}$ ; 50  $\mu\text{L}$ ) at  $-10^\circ\text{C}$  was added a solution of 0.1 N sodium iodide (50  $\mu\text{L}$ ) and 160  $\mu\text{Ci}$  of  $\text{Na}^{125}\text{I}$ , and then a solution of trifluoroacetic acid (10  $\mu\text{L}$ ). The reaction mixture was stirred at room temperature and made alkaline with 100  $\mu\text{L}$  of a saturated solution of  $\text{NaHCO}_3$  to give  $[\text{I}^{125}\text{I}]\text{-8}$  (radiochemical yield: 69 %): TLC R $_f$  0.5 (alumina,  $\text{CH}_2\text{Cl}_2$  / MeOH 95:5); HPLC R $_t$  27.1 min.

**Cytotoxicity assay.** Attached human ocular melanoma IPC227F and murin B16 cells were seeded in 96-well plates and incubated for 24 h at  $37^\circ\text{C}$  in a humidified atmosphere under 5%  $\text{CO}_2$  with standard medium (DMEM + 10% calf fetal serum). After addition of fresh medium containing increasing concentrations of drugs previously prepared in DMSO (final concentration 0.025%), cells were incubated for 48 h for the determination of  $\text{IC}_{50}$ , washed with 1X PBS buffer and then frozen at  $-80^\circ\text{C}$ . After thawing at room temperature, cells were incubated for 1 h at room temperature with 0.01%

Deleted: A solution of lithium (... [48])  
Deleted: ,  
Deleted: 1 eq, 0.  
Deleted: ,  
Deleted: 2 mmol) was added d (... [49])  
Deleted: ,  
Deleted: 17 mmol, 130 mg) in (... [50])  
Deleted: was  
Deleted: allowed to warm  
Deleted: at  
Deleted: to  $0^\circ\text{C}$ . The reaction (... [51])  
Deleted: the  
Deleted: adding  
Deleted: addition of  
Deleted: water (5 mL) and  
Deleted: exceed  
Deleted: excess  
Deleted: of  
Deleted: lithium aluminium h (... [52])  
Deleted: x  
Deleted: 50 mL). The combin (... [53])  
Deleted: was  
Deleted: purified by flash (... [54])  
Deleted: afford  
Deleted: give 59.  
Deleted: ,  
Deleted: 1 mg of **12** (yield: 48 (... [55])  
Deleted: ;  
Deleted: ; TLC R $_f$   
Deleted: R $_f$   
Deleted: 0.  
Deleted: ,  
Deleted: 4 (alumina  
Deleted: e  
Deleted: ,  $\text{CH}_2\text{Cl}_2$ /MeOH 95  
Deleted:  
Deleted: :5);  
Deleted: ;,...;,...;,...;,...; (... [56])  
Deleted: é...é...é...é...é...é... (... [57])  
Deleted: ,...;...i...natrium (... [58])  
Deleted:  
Deleted: ,...A...e...Tr (... [59])  
Deleted:  
Deleted: ,  
Deleted:  $\text{N}^4$ -(2-(die  
Deleted: é  
Deleted: thylamino)  
Deleted: é  
Deleted: thyl)-2-iodo- $\text{N}^1$ -(4-me  
Deleted: é  
Deleted: thyl-1-(4-me  
... [60]  
... [61]

SDS solution, frozen again at  $-80^{\circ}\text{C}$ , and then thawed again at room temperature. The Hoechst dye 33342 solution was added to each sample (final concentration  $15\text{ }\mu\text{g/ml}$ ) and plates were incubated for 1 h at room temperature on a plate shaker in the dark. Fluorescence was measured using a fluorescence microplate reader at 360/460 nm (Fluoroskan Ascent FL; Labsystems, Farnborough, Hampshire) and cell survival rates (percent cell survival relative to untreated control) were calculated. The cytotoxic activity of drugs was expressed as the concentration inhibiting cell growth by 50% ( $\text{IC}_{50}$ ) calculated from the survival curves.

Deleted: -

Deleted: in

Deleted: our

### Drug biodistribution

The specific activity of  $[^{125}\text{I}]\text{-12}$  was  $1.875\text{ Ci}/\mu\text{M}$ . It was injected IV at a concentration of  $0.07\text{ }\mu\text{M}/\text{mouse}$  ( $3.7\text{ }\times 10^{-3}\text{ mmol/kg}$ ) as  $32.7\text{ }\mu\text{Ci}$  ( $43.5\text{ }\times 10^6\text{ cpm}$ ). The drug biodistribution was examined at eight times with two mice per time: 15 min, 30 min, 1 h, 3 h, 6 h, 24 h, 48 h and 72 h post-injection. Mice were sacrificed, embedded in carboxymethylcellulose and frozen in liquid nitrogen. Sagittal cryodried sections  $40\text{ }\mu$  thick were quantified. The radioactivity was detected using an AMBIS counter (acquisition time 1000 min)

Deleted: :

Deleted: i

Deleted: ,

Deleted: i

Deleted: .

Deleted: .

Deleted: to

Deleted: realized

Deleted: on 8

Deleted: 2

Deleted:

Deleted: /

Deleted: ,

Deleted: included

Deleted: freezed

Deleted: cryodried

Deleted: detection of

Deleted: carried out

Deleted: by

Deleted: ®

Deleted: :

## **S6. Acknowledgments.**

We thank Dr M. Borel for the proton and carbon nuclear magnetic resonance spectra recorded on a Bruker DRX 500 instrument, M. Bayle for the synthesis of several intermediates and Dr J. Helfenbein and Dr M.-F. Moreau for many helpful discussions throughout the course of this work.

**Deleted:**

**Deleted:** performed

**Deleted:** . We also thank

**Deleted:** .

**Deleted:** We are grateful

**Deleted:** with Dr J. Helfenbein and Dr M.-F. Moreau





|                                                                                                |         |         |            |
|------------------------------------------------------------------------------------------------|---------|---------|------------|
|                                                                                                | H 8.57  | H 8.29  | Deleted: , |
|                                                                                                |         |         | Deleted: , |
|                                                                                                | N 13.32 | N 13.05 | Deleted: , |
|                                                                                                |         |         | Deleted: , |
| 12: (C <sub>32</sub> H <sub>52</sub> IN <sub>5</sub> O <sub>5</sub> , HCl, 1 H <sub>2</sub> O) | C 50.03 | C 50.00 | Deleted: , |
|                                                                                                |         |         | Deleted: , |
|                                                                                                | H 7.22  | H 7.32  | Deleted: , |
|                                                                                                |         |         | Deleted: , |
|                                                                                                | N 9.12  | N 8.98  | Deleted: , |
|                                                                                                |         |         | Deleted: , |

Radiochemical purity of [<sup>125</sup>I]-12: > 99.3% (detection with Flow Scintillation Analyser (FLO-ONE; Packard)).

Formatted

|                     |              |                      |
|---------------------|--------------|----------------------|
| Page 9: [1] Deleted | Richard Ryan | 9/6/2007 10:27:00 AM |
|---------------------|--------------|----------------------|

M

|                     |              |                      |
|---------------------|--------------|----------------------|
| Page 9: [1] Deleted | Richard Ryan | 9/6/2007 10:33:00 AM |
|---------------------|--------------|----------------------|

.

|                     |              |                      |
|---------------------|--------------|----------------------|
| Page 9: [2] Deleted | Richard Ryan | 9/6/2007 10:27:00 AM |
|---------------------|--------------|----------------------|

é

|                     |              |                      |
|---------------------|--------------|----------------------|
| Page 9: [2] Deleted | Richard Ryan | 9/6/2007 10:27:00 AM |
|---------------------|--------------|----------------------|

é

|                     |              |                      |
|---------------------|--------------|----------------------|
| Page 9: [2] Deleted | Richard Ryan | 9/6/2007 10:27:00 AM |
|---------------------|--------------|----------------------|

é

|                     |              |                      |
|---------------------|--------------|----------------------|
| Page 9: [2] Deleted | Richard Ryan | 9/6/2007 10:27:00 AM |
|---------------------|--------------|----------------------|

é

|                     |        |                      |
|---------------------|--------|----------------------|
| Page 9: [3] Deleted | VIVIER | 10/3/2007 5:17:00 PM |
|---------------------|--------|----------------------|

To a solution of dimethyl aminoterephthalate (1) (1 eq

|                     |        |                      |
|---------------------|--------|----------------------|
| Page 9: [4] Deleted | VIVIER | 10/3/2007 5:17:00 PM |
|---------------------|--------|----------------------|

90 g) in water (100 mL) was added a solution of HCl 37% to obtain a red suspension,  
and the mixture was vigorously stirred

|                     |        |                      |
|---------------------|--------|----------------------|
| Page 9: [5] Deleted | VIVIER | 10/3/2007 5:17:00 PM |
|---------------------|--------|----------------------|

for 30 min. at 0 °C under a nitrogen atmosphere. To the reaction mixture was added  
dropwise a

|                     |        |                      |
|---------------------|--------|----------------------|
| Page 9: [6] Deleted | VIVIER | 10/3/2007 5:17:00 PM |
|---------------------|--------|----------------------|

56 g) in 20 mL of water at 0 °C. T

|                     |        |                      |
|---------------------|--------|----------------------|
| Page 9: [7] Deleted | VIVIER | 10/3/2007 5:17:00 PM |
|---------------------|--------|----------------------|

he mixture was stirred for 45 min. and

|                     |        |                      |
|---------------------|--------|----------------------|
| Page 9: [8] Deleted | VIVIER | 10/3/2007 5:17:00 PM |
|---------------------|--------|----------------------|

7 mmol) and 12 mL of 1N potassium hydroxi

|                     |        |                      |
|---------------------|--------|----------------------|
| Page 9: [9] Deleted | VIVIER | 10/3/2007 5:17:00 PM |
|---------------------|--------|----------------------|

at 0°C were then added. The reaction mixture was stirred for 3 h at room temperature

|                      |        |                      |
|----------------------|--------|----------------------|
| Page 9: [10] Deleted | VIVIER | 10/3/2007 5:17:00 PM |
|----------------------|--------|----------------------|

made alkaline to pH = 12 with NaOH and extracted with CH<sub>2</sub>Cl<sub>2</sub> (3 ×

|                      |        |                      |
|----------------------|--------|----------------------|
| Page 9: [11] Deleted | VIVIER | 10/3/2007 5:17:00 PM |
|----------------------|--------|----------------------|

100 mL). The organic layer was dried over MgSO<sub>4</sub> and concentrated in part under vacuum to obtain 17.

|                      |              |                      |
|----------------------|--------------|----------------------|
| Page 9: [12] Deleted | Richard Ryan | 9/6/2007 10:31:00 AM |
|----------------------|--------------|----------------------|

,

|                      |              |                      |
|----------------------|--------------|----------------------|
| Page 9: [12] Deleted | Richard Ryan | 9/6/2007 10:31:00 AM |
|----------------------|--------------|----------------------|

,

|                      |              |                      |
|----------------------|--------------|----------------------|
| Page 9: [12] Deleted | Richard Ryan | 9/6/2007 10:31:00 AM |
|----------------------|--------------|----------------------|

,

|                      |              |                      |
|----------------------|--------------|----------------------|
| Page 9: [12] Deleted | Richard Ryan | 9/6/2007 10:31:00 AM |
|----------------------|--------------|----------------------|

,

|                      |              |                      |
|----------------------|--------------|----------------------|
| Page 9: [12] Deleted | Richard Ryan | 9/6/2007 10:31:00 AM |
|----------------------|--------------|----------------------|

et

|                      |              |                      |
|----------------------|--------------|----------------------|
| Page 9: [12] Deleted | Richard Ryan | 9/6/2007 10:31:00 AM |
|----------------------|--------------|----------------------|

,

|                      |              |                      |
|----------------------|--------------|----------------------|
| Page 9: [12] Deleted | Richard Ryan | 9/6/2007 10:31:00 AM |
|----------------------|--------------|----------------------|

,

|                      |              |                      |
|----------------------|--------------|----------------------|
| Page 9: [12] Deleted | Richard Ryan | 9/6/2007 10:31:00 AM |
|----------------------|--------------|----------------------|

et

|                      |              |                      |
|----------------------|--------------|----------------------|
| Page 9: [12] Deleted | Richard Ryan | 9/6/2007 10:31:00 AM |
|----------------------|--------------|----------------------|

,

|                      |              |                     |
|----------------------|--------------|---------------------|
| Page 9: [12] Deleted | Richard Ryan | 9/6/2007 1:11:00 PM |
|----------------------|--------------|---------------------|

,

|                      |              |                      |
|----------------------|--------------|----------------------|
| Page 9: [12] Deleted | Richard Ryan | 9/6/2007 10:32:00 AM |
|----------------------|--------------|----------------------|

,

|                      |              |                      |
|----------------------|--------------|----------------------|
| Page 9: [12] Deleted | Richard Ryan | 9/6/2007 10:32:00 AM |
|----------------------|--------------|----------------------|

,

|                      |              |                      |
|----------------------|--------------|----------------------|
| Page 9: [12] Deleted | Richard Ryan | 9/6/2007 10:32:00 AM |
|----------------------|--------------|----------------------|

,

|                      |              |                      |
|----------------------|--------------|----------------------|
| Page 9: [12] Deleted | Richard Ryan | 9/6/2007 10:32:00 AM |
|----------------------|--------------|----------------------|

,

|                      |              |                      |
|----------------------|--------------|----------------------|
| Page 9: [12] Deleted | Richard Ryan | 9/6/2007 10:32:00 AM |
|----------------------|--------------|----------------------|

,

|                      |              |                      |
|----------------------|--------------|----------------------|
| Page 9: [12] Deleted | Richard Ryan | 9/6/2007 10:32:00 AM |
|----------------------|--------------|----------------------|

,

|                      |              |                      |
|----------------------|--------------|----------------------|
| Page 9: [12] Deleted | Richard Ryan | 9/6/2007 10:32:00 AM |
|----------------------|--------------|----------------------|

,

|                      |              |                      |
|----------------------|--------------|----------------------|
| Page 9: [12] Deleted | Richard Ryan | 9/6/2007 10:32:00 AM |
|----------------------|--------------|----------------------|

,

|                      |              |                      |
|----------------------|--------------|----------------------|
| Page 9: [12] Deleted | Richard Ryan | 9/6/2007 10:32:00 AM |
|----------------------|--------------|----------------------|

,

|                      |              |                      |
|----------------------|--------------|----------------------|
| Page 9: [12] Deleted | Richard Ryan | 9/6/2007 10:32:00 AM |
|----------------------|--------------|----------------------|

,

|                      |              |                      |
|----------------------|--------------|----------------------|
| Page 9: [12] Deleted | Richard Ryan | 9/6/2007 10:32:00 AM |
|----------------------|--------------|----------------------|

,

|                      |              |                      |
|----------------------|--------------|----------------------|
| Page 9: [12] Deleted | Richard Ryan | 9/6/2007 10:32:00 AM |
|----------------------|--------------|----------------------|

,

|                      |              |                      |
|----------------------|--------------|----------------------|
| Page 9: [12] Deleted | Richard Ryan | 9/6/2007 10:32:00 AM |
|----------------------|--------------|----------------------|

,

|                      |              |                     |
|----------------------|--------------|---------------------|
| Page 9: [12] Deleted | Richard Ryan | 9/6/2007 1:11:00 PM |
|----------------------|--------------|---------------------|

A

|                      |              |                      |
|----------------------|--------------|----------------------|
| Page 9: [12] Deleted | Richard Ryan | 9/6/2007 10:32:00 AM |
|----------------------|--------------|----------------------|

.

|                      |              |                      |
|----------------------|--------------|----------------------|
| Page 9: [13] Deleted | Richard Ryan | 9/6/2007 10:33:00 AM |
|----------------------|--------------|----------------------|

|                      |              |                     |
|----------------------|--------------|---------------------|
| Page 9: [13] Deleted | Richard Ryan | 9/6/2007 1:37:00 PM |
|----------------------|--------------|---------------------|

M

|                      |              |                      |
|----------------------|--------------|----------------------|
| Page 9: [13] Deleted | Richard Ryan | 9/6/2007 10:33:00 AM |
|----------------------|--------------|----------------------|

|                      |              |                      |
|----------------------|--------------|----------------------|
| Page 9: [13] Deleted | Richard Ryan | 9/6/2007 10:33:00 AM |
|----------------------|--------------|----------------------|

.

|                       |              |                      |
|-----------------------|--------------|----------------------|
| Page 10: [14] Deleted | Richard Ryan | 9/6/2007 10:42:00 AM |
|-----------------------|--------------|----------------------|

é

|                       |              |                      |
|-----------------------|--------------|----------------------|
| Page 10: [14] Deleted | Richard Ryan | 9/6/2007 10:42:00 AM |
|-----------------------|--------------|----------------------|

é

|                       |              |                      |
|-----------------------|--------------|----------------------|
| Page 10: [14] Deleted | Richard Ryan | 9/6/2007 10:42:00 AM |
|-----------------------|--------------|----------------------|

de lithium

|                       |        |                      |
|-----------------------|--------|----------------------|
| Page 10: [15] Deleted | VIVIER | 10/3/2007 5:18:00 PM |
|-----------------------|--------|----------------------|

To a solution of lithium hydroxide monohydrate (0.13 g, 3.18 mmol, 1.5 eq) in water (3.5 mL) was added dropwise a solution of compound **4** (2.

Page 10: [16] Deleted

VIVIER

10/3/2007 5:18:00 PM

1 mg) in THF (3.5 mL) at 0 °C. The mixture was allowed to reach room temperature and then stirred for 1 h. The reaction mixture was evaporated under reduced pressure and the crude product was washed with acetone and dried to

Page 10: [17] Deleted

VIVIER

10/3/2007 5:18:00 PM

give 842 mg of **5** (yield: 100%): white solid; mp > 200 ± 1 °C, TLC Rf

Page 10: [18] Deleted

Richard Ryan

9/6/2007 10:43:00 AM

,

Page 10: [18] Deleted

Richard Ryan

9/6/2007 10:44:00 AM

,

Page 10: [18] Deleted

Richard Ryan

9/6/2007 10:44:00 AM

,

Page 10: [18] Deleted

Richard Ryan

9/6/2007 10:44:00 AM

,

Page 10: [19] Deleted

Richard Ryan

9/6/2007 10:44:00 AM

,

Page 10: [19] Deleted

Richard Ryan

9/6/2007 11:40:00 AM

;



|                       |              |                      |
|-----------------------|--------------|----------------------|
| Page 10: [19] Deleted | Richard Ryan | 9/6/2007 10:45:00 AM |
|-----------------------|--------------|----------------------|

,

|                       |              |                      |
|-----------------------|--------------|----------------------|
| Page 10: [19] Deleted | Richard Ryan | 9/6/2007 10:44:00 AM |
|-----------------------|--------------|----------------------|

,

|                       |              |                      |
|-----------------------|--------------|----------------------|
| Page 10: [19] Deleted | Richard Ryan | 9/6/2007 10:44:00 AM |
|-----------------------|--------------|----------------------|

,

|                       |              |                      |
|-----------------------|--------------|----------------------|
| Page 10: [19] Deleted | Richard Ryan | 9/6/2007 10:44:00 AM |
|-----------------------|--------------|----------------------|

,

|                       |              |                      |
|-----------------------|--------------|----------------------|
| Page 10: [19] Deleted | Richard Ryan | 9/6/2007 10:44:00 AM |
|-----------------------|--------------|----------------------|

,

|                       |              |                      |
|-----------------------|--------------|----------------------|
| Page 10: [19] Deleted | Richard Ryan | 9/6/2007 10:44:00 AM |
|-----------------------|--------------|----------------------|

,

|                       |              |                      |
|-----------------------|--------------|----------------------|
| Page 10: [19] Deleted | Richard Ryan | 9/6/2007 10:44:00 AM |
|-----------------------|--------------|----------------------|

,

|                       |              |                      |
|-----------------------|--------------|----------------------|
| Page 10: [19] Deleted | Richard Ryan | 9/6/2007 10:44:00 AM |
|-----------------------|--------------|----------------------|

,

|                       |              |                      |
|-----------------------|--------------|----------------------|
| Page 10: [19] Deleted | Richard Ryan | 9/6/2007 10:44:00 AM |
|-----------------------|--------------|----------------------|

,

|                       |              |                      |
|-----------------------|--------------|----------------------|
| Page 10: [19] Deleted | Richard Ryan | 9/6/2007 10:44:00 AM |
|-----------------------|--------------|----------------------|

,

|                       |              |                      |
|-----------------------|--------------|----------------------|
| Page 10: [19] Deleted | Richard Ryan | 9/6/2007 10:44:00 AM |
|-----------------------|--------------|----------------------|

,

|                       |              |                      |
|-----------------------|--------------|----------------------|
| Page 10: [19] Deleted | Richard Ryan | 9/6/2007 10:44:00 AM |
|-----------------------|--------------|----------------------|

,

|                       |              |                      |
|-----------------------|--------------|----------------------|
| Page 10: [19] Deleted | Richard Ryan | 9/6/2007 10:44:00 AM |
|-----------------------|--------------|----------------------|

,

|                       |              |                      |
|-----------------------|--------------|----------------------|
| Page 10: [19] Deleted | Richard Ryan | 9/6/2007 11:40:00 AM |
|-----------------------|--------------|----------------------|

;

|                       |              |                      |
|-----------------------|--------------|----------------------|
| Page 10: [20] Deleted | Richard Ryan | 9/6/2007 11:40:00 AM |
|-----------------------|--------------|----------------------|

;

|                       |              |                      |
|-----------------------|--------------|----------------------|
| Page 10: [20] Deleted | Richard Ryan | 9/6/2007 10:45:00 AM |
|-----------------------|--------------|----------------------|

,

|                       |              |                      |
|-----------------------|--------------|----------------------|
| Page 10: [21] Deleted | Richard Ryan | 9/6/2007 10:45:00 AM |
|-----------------------|--------------|----------------------|

é

|                       |              |                      |
|-----------------------|--------------|----------------------|
| Page 10: [21] Deleted | Richard Ryan | 9/6/2007 10:45:00 AM |
|-----------------------|--------------|----------------------|

é

|                       |              |                      |
|-----------------------|--------------|----------------------|
| Page 10: [21] Deleted | Richard Ryan | 9/6/2007 10:45:00 AM |
|-----------------------|--------------|----------------------|

é

|                                         |              |                      |
|-----------------------------------------|--------------|----------------------|
| Page 10: [21] Deleted<br>de lithium     | Richard Ryan | 9/6/2007 10:45:00 AM |
| Page 10: [22] Deleted<br>i              | Richard Ryan | 9/6/2007 10:45:00 AM |
| Page 10: [22] Deleted<br>é              | Richard Ryan | 9/6/2007 10:45:00 AM |
| Page 10: [22] Deleted<br>;              | Richard Ryan | 9/6/2007 11:40:00 AM |
| Page 10: [22] Deleted<br>,              | Richard Ryan | 9/6/2007 10:45:00 AM |
| Page 10: [22] Deleted<br>;              | Richard Ryan | 9/6/2007 11:40:00 AM |
| Page 10: [22] Deleted<br>,              | Richard Ryan | 9/6/2007 10:45:00 AM |
| Page 10: [22] Deleted<br>afford         | Richard Ryan | 9/6/2007 10:46:00 AM |
| Page 10: [22] Deleted<br>R <sub>f</sub> | Richard Ryan | 9/6/2007 10:52:00 AM |
| Page 10: [23] Deleted                   | Richard Ryan | 9/6/2007 10:52:00 AM |

,

|                       |              |                      |
|-----------------------|--------------|----------------------|
| Page 10: [23] Deleted | Richard Ryan | 9/6/2007 10:54:00 AM |
|-----------------------|--------------|----------------------|

,

|                       |              |                      |
|-----------------------|--------------|----------------------|
| Page 10: [23] Deleted | Richard Ryan | 9/6/2007 10:54:00 AM |
|-----------------------|--------------|----------------------|

,

|                       |              |                      |
|-----------------------|--------------|----------------------|
| Page 10: [23] Deleted | Richard Ryan | 9/6/2007 10:55:00 AM |
|-----------------------|--------------|----------------------|

,

|                       |              |                     |
|-----------------------|--------------|---------------------|
| Page 10: [23] Deleted | Richard Ryan | 9/6/2007 1:16:00 PM |
|-----------------------|--------------|---------------------|

,

|                       |              |                      |
|-----------------------|--------------|----------------------|
| Page 10: [23] Deleted | Richard Ryan | 9/6/2007 11:40:00 AM |
|-----------------------|--------------|----------------------|

;  
;

|                       |              |                      |
|-----------------------|--------------|----------------------|
| Page 10: [23] Deleted | Richard Ryan | 9/6/2007 10:55:00 AM |
|-----------------------|--------------|----------------------|

,

|                       |              |                     |
|-----------------------|--------------|---------------------|
| Page 10: [23] Deleted | Richard Ryan | 9/6/2007 1:16:00 PM |
|-----------------------|--------------|---------------------|

et

|                       |              |                      |
|-----------------------|--------------|----------------------|
| Page 10: [23] Deleted | Richard Ryan | 9/6/2007 11:40:00 AM |
|-----------------------|--------------|----------------------|

;  
;

|                       |              |                      |
|-----------------------|--------------|----------------------|
| Page 10: [23] Deleted | Richard Ryan | 9/6/2007 10:55:00 AM |
|-----------------------|--------------|----------------------|

,

|                       |              |                      |
|-----------------------|--------------|----------------------|
| Page 10: [23] Deleted | Richard Ryan | 9/6/2007 11:40:00 AM |
|-----------------------|--------------|----------------------|

;

|                       |              |                      |
|-----------------------|--------------|----------------------|
| Page 10: [23] Deleted | Richard Ryan | 9/6/2007 10:56:00 AM |
|-----------------------|--------------|----------------------|

,

|                       |              |                      |
|-----------------------|--------------|----------------------|
| Page 10: [23] Deleted | Richard Ryan | 9/6/2007 11:40:00 AM |
|-----------------------|--------------|----------------------|

;

|                       |              |                      |
|-----------------------|--------------|----------------------|
| Page 10: [23] Deleted | Richard Ryan | 9/6/2007 10:56:00 AM |
|-----------------------|--------------|----------------------|

,

|                       |              |                      |
|-----------------------|--------------|----------------------|
| Page 10: [23] Deleted | Richard Ryan | 9/6/2007 11:40:00 AM |
|-----------------------|--------------|----------------------|

;

|                       |              |                      |
|-----------------------|--------------|----------------------|
| Page 10: [23] Deleted | Richard Ryan | 9/6/2007 10:56:00 AM |
|-----------------------|--------------|----------------------|

,

|                       |              |                      |
|-----------------------|--------------|----------------------|
| Page 10: [23] Deleted | Richard Ryan | 9/6/2007 11:40:00 AM |
|-----------------------|--------------|----------------------|

;

|                       |              |                      |
|-----------------------|--------------|----------------------|
| Page 10: [23] Deleted | Richard Ryan | 9/6/2007 10:56:00 AM |
|-----------------------|--------------|----------------------|

,

|                       |              |                      |
|-----------------------|--------------|----------------------|
| Page 10: [23] Deleted | Richard Ryan | 9/6/2007 11:40:00 AM |
|-----------------------|--------------|----------------------|

;

|                       |              |                      |
|-----------------------|--------------|----------------------|
| Page 10: [23] Deleted | Richard Ryan | 9/6/2007 10:56:00 AM |
|-----------------------|--------------|----------------------|

,

|                       |              |                      |
|-----------------------|--------------|----------------------|
| Page 10: [23] Deleted | Richard Ryan | 9/6/2007 10:56:00 AM |
|-----------------------|--------------|----------------------|

,

|                       |              |                      |
|-----------------------|--------------|----------------------|
| Page 10: [23] Deleted | Richard Ryan | 9/6/2007 11:40:00 AM |
|-----------------------|--------------|----------------------|

.

,

|                       |              |                      |
|-----------------------|--------------|----------------------|
| Page 10: [23] Deleted | Richard Ryan | 9/6/2007 10:56:00 AM |
|-----------------------|--------------|----------------------|

,

|                       |              |                      |
|-----------------------|--------------|----------------------|
| Page 10: [23] Deleted | Richard Ryan | 9/6/2007 10:56:00 AM |
|-----------------------|--------------|----------------------|

,

|                       |              |                      |
|-----------------------|--------------|----------------------|
| Page 10: [23] Deleted | Richard Ryan | 9/6/2007 10:57:00 AM |
|-----------------------|--------------|----------------------|

|                       |              |                      |
|-----------------------|--------------|----------------------|
| Page 10: [23] Deleted | Richard Ryan | 9/6/2007 10:56:00 AM |
|-----------------------|--------------|----------------------|

,

|                       |              |                      |
|-----------------------|--------------|----------------------|
| Page 10: [23] Deleted | Richard Ryan | 9/6/2007 10:57:00 AM |
|-----------------------|--------------|----------------------|

et

|                       |              |                      |
|-----------------------|--------------|----------------------|
| Page 10: [23] Deleted | Richard Ryan | 9/6/2007 10:57:00 AM |
|-----------------------|--------------|----------------------|

,

|                       |              |                      |
|-----------------------|--------------|----------------------|
| Page 10: [23] Deleted | Richard Ryan | 9/6/2007 10:57:00 AM |
|-----------------------|--------------|----------------------|

,

|                       |              |                      |
|-----------------------|--------------|----------------------|
| Page 10: [23] Deleted | Richard Ryan | 9/6/2007 10:57:00 AM |
|-----------------------|--------------|----------------------|

,

|                       |              |                      |
|-----------------------|--------------|----------------------|
| Page 10: [23] Deleted | Richard Ryan | 9/6/2007 10:57:00 AM |
|-----------------------|--------------|----------------------|

et

|                       |              |                      |
|-----------------------|--------------|----------------------|
| Page 10: [23] Deleted | Richard Ryan | 9/6/2007 10:57:00 AM |
|-----------------------|--------------|----------------------|

,

|                       |              |                      |
|-----------------------|--------------|----------------------|
| Page 10: [23] Deleted | Richard Ryan | 9/6/2007 11:40:00 AM |
|-----------------------|--------------|----------------------|

;

|                       |              |                      |
|-----------------------|--------------|----------------------|
| Page 10: [23] Deleted | Richard Ryan | 9/6/2007 10:57:00 AM |
|-----------------------|--------------|----------------------|

,

|                       |              |                      |
|-----------------------|--------------|----------------------|
| Page 10: [23] Deleted | Richard Ryan | 9/6/2007 10:57:00 AM |
|-----------------------|--------------|----------------------|

P

|                       |              |                      |
|-----------------------|--------------|----------------------|
| Page 10: [23] Deleted | Richard Ryan | 9/6/2007 11:40:00 AM |
|-----------------------|--------------|----------------------|

;

|                       |              |                      |
|-----------------------|--------------|----------------------|
| Page 10: [23] Deleted | Richard Ryan | 9/6/2007 10:57:00 AM |
|-----------------------|--------------|----------------------|

,

|                       |              |                      |
|-----------------------|--------------|----------------------|
| Page 10: [23] Deleted | Richard Ryan | 9/6/2007 10:57:00 AM |
|-----------------------|--------------|----------------------|

P

|                       |              |                      |
|-----------------------|--------------|----------------------|
| Page 10: [23] Deleted | Richard Ryan | 9/6/2007 11:40:00 AM |
|-----------------------|--------------|----------------------|

;  
,

|                       |              |                      |
|-----------------------|--------------|----------------------|
| Page 10: [23] Deleted | Richard Ryan | 9/6/2007 10:57:00 AM |
|-----------------------|--------------|----------------------|

,

|                       |              |                      |
|-----------------------|--------------|----------------------|
| Page 10: [23] Deleted | Richard Ryan | 9/6/2007 11:40:00 AM |
|-----------------------|--------------|----------------------|

;  
,

|                       |              |                      |
|-----------------------|--------------|----------------------|
| Page 10: [23] Deleted | Richard Ryan | 9/6/2007 10:57:00 AM |
|-----------------------|--------------|----------------------|

,

|                       |              |                      |
|-----------------------|--------------|----------------------|
| Page 10: [23] Deleted | Richard Ryan | 9/6/2007 11:40:00 AM |
|-----------------------|--------------|----------------------|

;  
,

|                       |              |                      |
|-----------------------|--------------|----------------------|
| Page 10: [23] Deleted | Richard Ryan | 9/6/2007 10:57:00 AM |
|-----------------------|--------------|----------------------|

,

|                       |              |                      |
|-----------------------|--------------|----------------------|
| Page 10: [23] Deleted | Richard Ryan | 9/6/2007 11:40:00 AM |
|-----------------------|--------------|----------------------|

;  
,

|                       |              |                      |
|-----------------------|--------------|----------------------|
| Page 10: [23] Deleted | Richard Ryan | 9/6/2007 10:57:00 AM |
|-----------------------|--------------|----------------------|

,

|                       |              |                      |
|-----------------------|--------------|----------------------|
| Page 10: [23] Deleted | Richard Ryan | 9/6/2007 11:40:00 AM |
|-----------------------|--------------|----------------------|

;  
,

|                       |              |                      |
|-----------------------|--------------|----------------------|
| Page 10: [23] Deleted | Richard Ryan | 9/6/2007 10:57:00 AM |
|-----------------------|--------------|----------------------|

,



|                       |              |                      |
|-----------------------|--------------|----------------------|
| Page 10: [23] Deleted | Richard Ryan | 9/6/2007 11:40:00 AM |
|-----------------------|--------------|----------------------|

;

|                       |              |                      |
|-----------------------|--------------|----------------------|
| Page 10: [23] Deleted | Richard Ryan | 9/6/2007 10:57:00 AM |
|-----------------------|--------------|----------------------|

,

|                       |              |                      |
|-----------------------|--------------|----------------------|
| Page 10: [23] Deleted | Richard Ryan | 9/6/2007 11:40:00 AM |
|-----------------------|--------------|----------------------|

;

|                       |              |                      |
|-----------------------|--------------|----------------------|
| Page 10: [23] Deleted | Richard Ryan | 9/6/2007 10:57:00 AM |
|-----------------------|--------------|----------------------|

,

|                       |              |                      |
|-----------------------|--------------|----------------------|
| Page 10: [23] Deleted | Richard Ryan | 9/6/2007 10:57:00 AM |
|-----------------------|--------------|----------------------|

,

|                       |              |                      |
|-----------------------|--------------|----------------------|
| Page 10: [23] Deleted | Richard Ryan | 9/6/2007 10:57:00 AM |
|-----------------------|--------------|----------------------|

et

|                       |              |                      |
|-----------------------|--------------|----------------------|
| Page 10: [23] Deleted | Richard Ryan | 9/6/2007 10:57:00 AM |
|-----------------------|--------------|----------------------|

,

|                       |              |                      |
|-----------------------|--------------|----------------------|
| Page 10: [23] Deleted | Richard Ryan | 9/6/2007 10:57:00 AM |
|-----------------------|--------------|----------------------|

et

|                       |              |                      |
|-----------------------|--------------|----------------------|
| Page 10: [23] Deleted | Richard Ryan | 9/6/2007 11:40:00 AM |
|-----------------------|--------------|----------------------|

;

|                       |              |                      |
|-----------------------|--------------|----------------------|
| Page 10: [24] Deleted | Richard Ryan | 9/6/2007 11:40:00 AM |
|-----------------------|--------------|----------------------|

;

|                       |              |                      |
|-----------------------|--------------|----------------------|
| Page 10: [24] Deleted | Richard Ryan | 9/6/2007 10:58:00 AM |
|-----------------------|--------------|----------------------|

,

|                       |              |                     |
|-----------------------|--------------|---------------------|
| Page 10: [24] Deleted | Richard Ryan | 9/6/2007 1:17:00 PM |
|-----------------------|--------------|---------------------|

A

|                       |              |                      |
|-----------------------|--------------|----------------------|
| Page 10: [24] Deleted | Richard Ryan | 9/6/2007 10:58:00 AM |
|-----------------------|--------------|----------------------|

,

|                       |              |                      |
|-----------------------|--------------|----------------------|
| Page 10: [25] Deleted | Richard Ryan | 9/6/2007 10:58:00 AM |
|-----------------------|--------------|----------------------|

é

|                       |              |                      |
|-----------------------|--------------|----------------------|
| Page 10: [25] Deleted | Richard Ryan | 9/6/2007 10:58:00 AM |
|-----------------------|--------------|----------------------|

é

|                       |              |                      |
|-----------------------|--------------|----------------------|
| Page 10: [25] Deleted | Richard Ryan | 9/6/2007 10:58:00 AM |
|-----------------------|--------------|----------------------|

é

|                       |              |                      |
|-----------------------|--------------|----------------------|
| Page 10: [25] Deleted | Richard Ryan | 9/6/2007 10:58:00 AM |
|-----------------------|--------------|----------------------|

é

|                       |              |                      |
|-----------------------|--------------|----------------------|
| Page 10: [25] Deleted | Richard Ryan | 9/6/2007 10:58:00 AM |
|-----------------------|--------------|----------------------|

é

|                       |              |                      |
|-----------------------|--------------|----------------------|
| Page 10: [25] Deleted | Richard Ryan | 9/6/2007 10:58:00 AM |
|-----------------------|--------------|----------------------|

é

|                       |              |                      |
|-----------------------|--------------|----------------------|
| Page 10: [25] Deleted | Richard Ryan | 9/6/2007 10:58:00 AM |
|-----------------------|--------------|----------------------|

é

|                       |              |                      |
|-----------------------|--------------|----------------------|
| Page 10: [25] Deleted | Richard Ryan | 9/6/2007 10:58:00 AM |
|-----------------------|--------------|----------------------|

é

|                       |              |                      |
|-----------------------|--------------|----------------------|
| Page 10: [25] Deleted | Richard Ryan | 9/6/2007 10:58:00 AM |
|-----------------------|--------------|----------------------|

é

|                       |        |                      |
|-----------------------|--------|----------------------|
| Page 10: [26] Deleted | VIVIER | 10/3/2007 5:19:00 PM |
|-----------------------|--------|----------------------|

The iodination of Weinreb amide **9** (1 e

|                       |        |                      |
|-----------------------|--------|----------------------|
| Page 10: [27] Deleted | VIVIER | 10/3/2007 5:19:00 PM |
|-----------------------|--------|----------------------|

51 mmol, 380 mg) was achieved

|                       |        |                      |
|-----------------------|--------|----------------------|
| Page 10: [28] Deleted | VIVIER | 10/3/2007 5:19:00 PM |
|-----------------------|--------|----------------------|

using method C.

The crude product was purified by flash chromatography (aluminium oxide, CH<sub>2</sub>Cl<sub>2</sub>/gradient of MeOH 0 up to 2 %) to

|                       |        |                      |
|-----------------------|--------|----------------------|
| Page 10: [29] Deleted | VIVIER | 10/3/2007 5:19:00 PM |
|-----------------------|--------|----------------------|

give 290 mg of **11** (yield: 73%): beige solid; mp 120 ± 1 °C; TLC

|                       |              |                      |
|-----------------------|--------------|----------------------|
| Page 10: [30] Deleted | Richard Ryan | 9/6/2007 11:40:00 AM |
|-----------------------|--------------|----------------------|

;

|                       |              |                      |
|-----------------------|--------------|----------------------|
| Page 10: [30] Deleted | Richard Ryan | 9/6/2007 10:59:00 AM |
|-----------------------|--------------|----------------------|

,

|                       |              |                      |
|-----------------------|--------------|----------------------|
| Page 10: [30] Deleted | Richard Ryan | 9/6/2007 11:40:00 AM |
|-----------------------|--------------|----------------------|

;

|                       |              |                      |
|-----------------------|--------------|----------------------|
| Page 10: [30] Deleted | Richard Ryan | 9/6/2007 10:59:00 AM |
|-----------------------|--------------|----------------------|

,

|                       |              |                      |
|-----------------------|--------------|----------------------|
| Page 10: [30] Deleted | Richard Ryan | 9/6/2007 10:59:00 AM |
|-----------------------|--------------|----------------------|

,

|                       |              |                      |
|-----------------------|--------------|----------------------|
| Page 10: [30] Deleted | Richard Ryan | 9/6/2007 11:40:00 AM |
|-----------------------|--------------|----------------------|

;

|                       |              |                      |
|-----------------------|--------------|----------------------|
| Page 10: [30] Deleted | Richard Ryan | 9/6/2007 10:59:00 AM |
|-----------------------|--------------|----------------------|

,

|                       |              |                      |
|-----------------------|--------------|----------------------|
| Page 10: [30] Deleted | Richard Ryan | 9/6/2007 10:59:00 AM |
|-----------------------|--------------|----------------------|

et

|                       |              |                      |
|-----------------------|--------------|----------------------|
| Page 10: [30] Deleted | Richard Ryan | 9/6/2007 11:40:00 AM |
|-----------------------|--------------|----------------------|

;

|                       |              |                      |
|-----------------------|--------------|----------------------|
| Page 10: [30] Deleted | Richard Ryan | 9/6/2007 11:00:00 AM |
|-----------------------|--------------|----------------------|

,

|                       |              |                      |
|-----------------------|--------------|----------------------|
| Page 10: [30] Deleted | Richard Ryan | 9/6/2007 11:40:00 AM |
|-----------------------|--------------|----------------------|

;

|                       |              |                      |
|-----------------------|--------------|----------------------|
| Page 10: [30] Deleted | Richard Ryan | 9/6/2007 11:00:00 AM |
|-----------------------|--------------|----------------------|

,

|                       |              |                      |
|-----------------------|--------------|----------------------|
| Page 10: [30] Deleted | Richard Ryan | 9/6/2007 11:40:00 AM |
|-----------------------|--------------|----------------------|

;

|                       |              |                      |
|-----------------------|--------------|----------------------|
| Page 10: [30] Deleted | Richard Ryan | 9/6/2007 11:00:00 AM |
|-----------------------|--------------|----------------------|

,

|                       |              |                      |
|-----------------------|--------------|----------------------|
| Page 10: [30] Deleted | Richard Ryan | 9/6/2007 11:40:00 AM |
|-----------------------|--------------|----------------------|

;

|                       |              |                      |
|-----------------------|--------------|----------------------|
| Page 10: [30] Deleted | Richard Ryan | 9/6/2007 11:00:00 AM |
|-----------------------|--------------|----------------------|

,

|                       |              |                      |
|-----------------------|--------------|----------------------|
| Page 10: [30] Deleted | Richard Ryan | 9/6/2007 11:40:00 AM |
|-----------------------|--------------|----------------------|

;

|                       |              |                      |
|-----------------------|--------------|----------------------|
| Page 10: [30] Deleted | Richard Ryan | 9/6/2007 11:00:00 AM |
|-----------------------|--------------|----------------------|

,

|                       |              |                      |
|-----------------------|--------------|----------------------|
| Page 10: [30] Deleted | Richard Ryan | 9/6/2007 11:40:00 AM |
|-----------------------|--------------|----------------------|

;

|                       |              |                      |
|-----------------------|--------------|----------------------|
| Page 10: [30] Deleted | Richard Ryan | 9/6/2007 11:00:00 AM |
|-----------------------|--------------|----------------------|

,

|                       |              |                      |
|-----------------------|--------------|----------------------|
| Page 10: [30] Deleted | Richard Ryan | 9/6/2007 11:00:00 AM |
|-----------------------|--------------|----------------------|

et

|                       |              |                      |
|-----------------------|--------------|----------------------|
| Page 10: [30] Deleted | Richard Ryan | 9/6/2007 11:40:00 AM |
|-----------------------|--------------|----------------------|

;

|                       |              |                      |
|-----------------------|--------------|----------------------|
| Page 10: [30] Deleted | Richard Ryan | 9/6/2007 11:00:00 AM |
|-----------------------|--------------|----------------------|

,

|                       |              |                      |
|-----------------------|--------------|----------------------|
| Page 10: [30] Deleted | Richard Ryan | 9/6/2007 11:40:00 AM |
|-----------------------|--------------|----------------------|

;

|                       |              |                      |
|-----------------------|--------------|----------------------|
| Page 10: [30] Deleted | Richard Ryan | 9/6/2007 11:00:00 AM |
|-----------------------|--------------|----------------------|

,

|                       |              |                      |
|-----------------------|--------------|----------------------|
| Page 10: [30] Deleted | Richard Ryan | 9/6/2007 11:40:00 AM |
|-----------------------|--------------|----------------------|

;

|                       |              |                      |
|-----------------------|--------------|----------------------|
| Page 10: [30] Deleted | Richard Ryan | 9/6/2007 11:00:00 AM |
|-----------------------|--------------|----------------------|

,

|                       |              |                      |
|-----------------------|--------------|----------------------|
| Page 10: [30] Deleted | Richard Ryan | 9/6/2007 11:00:00 AM |
|-----------------------|--------------|----------------------|

,

|                       |              |                      |
|-----------------------|--------------|----------------------|
| Page 10: [30] Deleted | Richard Ryan | 9/6/2007 11:40:00 AM |
|-----------------------|--------------|----------------------|

;

|                       |              |                      |
|-----------------------|--------------|----------------------|
| Page 10: [30] Deleted | Richard Ryan | 9/6/2007 11:00:00 AM |
|-----------------------|--------------|----------------------|

,

|                       |              |                      |
|-----------------------|--------------|----------------------|
| Page 10: [30] Deleted | Richard Ryan | 9/6/2007 11:40:00 AM |
|-----------------------|--------------|----------------------|

,

|                       |              |                      |
|-----------------------|--------------|----------------------|
| Page 10: [30] Deleted | Richard Ryan | 9/6/2007 11:00:00 AM |
|-----------------------|--------------|----------------------|

,

|                       |              |                      |
|-----------------------|--------------|----------------------|
| Page 10: [30] Deleted | Richard Ryan | 9/6/2007 11:40:00 AM |
|-----------------------|--------------|----------------------|

,

|                       |              |                      |
|-----------------------|--------------|----------------------|
| Page 10: [30] Deleted | Richard Ryan | 9/6/2007 11:01:00 AM |
|-----------------------|--------------|----------------------|

,

|                       |              |                      |
|-----------------------|--------------|----------------------|
| Page 10: [30] Deleted | Richard Ryan | 9/6/2007 11:01:00 AM |
|-----------------------|--------------|----------------------|

,

|                       |              |                      |
|-----------------------|--------------|----------------------|
| Page 10: [30] Deleted | Richard Ryan | 9/6/2007 11:40:00 AM |
|-----------------------|--------------|----------------------|

,

|                       |              |                      |
|-----------------------|--------------|----------------------|
| Page 10: [30] Deleted | Richard Ryan | 9/6/2007 11:01:00 AM |
|-----------------------|--------------|----------------------|

,

|                       |              |                      |
|-----------------------|--------------|----------------------|
| Page 11: [31] Deleted | Richard Ryan | 9/6/2007 11:01:00 AM |
|-----------------------|--------------|----------------------|

,

|                       |              |                      |
|-----------------------|--------------|----------------------|
| Page 11: [31] Deleted | Richard Ryan | 9/6/2007 11:01:00 AM |
|-----------------------|--------------|----------------------|

,

|                       |              |                      |
|-----------------------|--------------|----------------------|
| Page 11: [31] Deleted | Richard Ryan | 9/6/2007 11:40:00 AM |
|-----------------------|--------------|----------------------|

;  
,

|                       |              |                      |
|-----------------------|--------------|----------------------|
| Page 11: [31] Deleted | Richard Ryan | 9/6/2007 11:01:00 AM |
|-----------------------|--------------|----------------------|

,

|                       |              |                      |
|-----------------------|--------------|----------------------|
| Page 11: [31] Deleted | Richard Ryan | 9/6/2007 11:40:00 AM |
|-----------------------|--------------|----------------------|

;  
,

|                       |              |                      |
|-----------------------|--------------|----------------------|
| Page 11: [31] Deleted | Richard Ryan | 9/6/2007 11:01:00 AM |
|-----------------------|--------------|----------------------|

,

|                       |              |                      |
|-----------------------|--------------|----------------------|
| Page 11: [31] Deleted | Richard Ryan | 9/6/2007 11:40:00 AM |
|-----------------------|--------------|----------------------|

;  
,

|                       |              |                      |
|-----------------------|--------------|----------------------|
| Page 11: [31] Deleted | Richard Ryan | 9/6/2007 11:01:00 AM |
|-----------------------|--------------|----------------------|

,

|                       |              |                      |
|-----------------------|--------------|----------------------|
| Page 11: [31] Deleted | Richard Ryan | 9/6/2007 11:40:00 AM |
|-----------------------|--------------|----------------------|

;  
,

|                       |              |                      |
|-----------------------|--------------|----------------------|
| Page 11: [31] Deleted | Richard Ryan | 9/6/2007 11:01:00 AM |
|-----------------------|--------------|----------------------|

,

|                       |              |                      |
|-----------------------|--------------|----------------------|
| Page 11: [31] Deleted | Richard Ryan | 9/6/2007 11:40:00 AM |
|-----------------------|--------------|----------------------|

;  
,

|                       |              |                      |
|-----------------------|--------------|----------------------|
| Page 11: [31] Deleted | Richard Ryan | 9/6/2007 11:01:00 AM |
|-----------------------|--------------|----------------------|

,



|                       |              |                      |
|-----------------------|--------------|----------------------|
| Page 11: [31] Deleted | Richard Ryan | 9/6/2007 11:01:00 AM |
|-----------------------|--------------|----------------------|

,

|                       |              |                      |
|-----------------------|--------------|----------------------|
| Page 11: [31] Deleted | Richard Ryan | 9/6/2007 11:40:00 AM |
|-----------------------|--------------|----------------------|

,

|                       |              |                      |
|-----------------------|--------------|----------------------|
| Page 11: [31] Deleted | Richard Ryan | 9/6/2007 11:01:00 AM |
|-----------------------|--------------|----------------------|

,

|                       |              |                      |
|-----------------------|--------------|----------------------|
| Page 11: [31] Deleted | Richard Ryan | 9/6/2007 11:40:00 AM |
|-----------------------|--------------|----------------------|

,

|                       |              |                      |
|-----------------------|--------------|----------------------|
| Page 11: [31] Deleted | Richard Ryan | 9/6/2007 11:01:00 AM |
|-----------------------|--------------|----------------------|

,

|                       |              |                      |
|-----------------------|--------------|----------------------|
| Page 11: [31] Deleted | Richard Ryan | 9/6/2007 11:01:00 AM |
|-----------------------|--------------|----------------------|

,

|                       |              |                      |
|-----------------------|--------------|----------------------|
| Page 11: [31] Deleted | Richard Ryan | 9/6/2007 11:01:00 AM |
|-----------------------|--------------|----------------------|

,

|                       |              |                      |
|-----------------------|--------------|----------------------|
| Page 11: [31] Deleted | Richard Ryan | 9/6/2007 11:01:00 AM |
|-----------------------|--------------|----------------------|

,

|                       |              |                      |
|-----------------------|--------------|----------------------|
| Page 11: [31] Deleted | Richard Ryan | 9/6/2007 11:01:00 AM |
|-----------------------|--------------|----------------------|

,

|                       |              |                      |
|-----------------------|--------------|----------------------|
| Page 11: [31] Deleted | Richard Ryan | 9/6/2007 11:01:00 AM |
|-----------------------|--------------|----------------------|

,

|                       |              |                      |
|-----------------------|--------------|----------------------|
| Page 11: [31] Deleted | Richard Ryan | 9/6/2007 11:01:00 AM |
|-----------------------|--------------|----------------------|

,

|                       |              |                      |
|-----------------------|--------------|----------------------|
| Page 11: [31] Deleted | Richard Ryan | 9/6/2007 11:01:00 AM |
|-----------------------|--------------|----------------------|

,

|                       |              |                      |
|-----------------------|--------------|----------------------|
| Page 11: [31] Deleted | Richard Ryan | 9/6/2007 11:01:00 AM |
|-----------------------|--------------|----------------------|

U

|                       |              |                      |
|-----------------------|--------------|----------------------|
| Page 11: [31] Deleted | Richard Ryan | 9/6/2007 11:01:00 AM |
|-----------------------|--------------|----------------------|

,

|                       |              |                      |
|-----------------------|--------------|----------------------|
| Page 11: [31] Deleted | Richard Ryan | 9/6/2007 11:01:00 AM |
|-----------------------|--------------|----------------------|

U

|                       |              |                      |
|-----------------------|--------------|----------------------|
| Page 11: [31] Deleted | Richard Ryan | 9/6/2007 11:02:00 AM |
|-----------------------|--------------|----------------------|

,

|                       |              |                      |
|-----------------------|--------------|----------------------|
| Page 11: [31] Deleted | Richard Ryan | 9/6/2007 11:02:00 AM |
|-----------------------|--------------|----------------------|

,

|                       |              |                      |
|-----------------------|--------------|----------------------|
| Page 11: [31] Deleted | Richard Ryan | 9/6/2007 11:02:00 AM |
|-----------------------|--------------|----------------------|

,

|                       |              |                      |
|-----------------------|--------------|----------------------|
| Page 11: [31] Deleted | Richard Ryan | 9/6/2007 11:40:00 AM |
|-----------------------|--------------|----------------------|

.

,

|                       |              |                      |
|-----------------------|--------------|----------------------|
| Page 11: [31] Deleted | Richard Ryan | 9/6/2007 11:02:00 AM |
|-----------------------|--------------|----------------------|

,

|                       |              |                      |
|-----------------------|--------------|----------------------|
| Page 11: [31] Deleted | Richard Ryan | 9/6/2007 11:02:00 AM |
|-----------------------|--------------|----------------------|

,

|                       |              |                      |
|-----------------------|--------------|----------------------|
| Page 11: [31] Deleted | Richard Ryan | 9/6/2007 11:02:00 AM |
|-----------------------|--------------|----------------------|

,

|                       |              |                      |
|-----------------------|--------------|----------------------|
| Page 11: [31] Deleted | Richard Ryan | 9/6/2007 11:02:00 AM |
|-----------------------|--------------|----------------------|

,

|                       |              |                      |
|-----------------------|--------------|----------------------|
| Page 11: [31] Deleted | Richard Ryan | 9/6/2007 11:02:00 AM |
|-----------------------|--------------|----------------------|

,

|                       |              |                      |
|-----------------------|--------------|----------------------|
| Page 11: [31] Deleted | Richard Ryan | 9/6/2007 11:02:00 AM |
|-----------------------|--------------|----------------------|

,

|                       |              |                      |
|-----------------------|--------------|----------------------|
| Page 11: [31] Deleted | Richard Ryan | 9/6/2007 11:02:00 AM |
|-----------------------|--------------|----------------------|

,

|                       |              |                      |
|-----------------------|--------------|----------------------|
| Page 11: [31] Deleted | Richard Ryan | 9/6/2007 11:02:00 AM |
|-----------------------|--------------|----------------------|

et

|                       |              |                      |
|-----------------------|--------------|----------------------|
| Page 11: [31] Deleted | Richard Ryan | 9/6/2007 11:02:00 AM |
|-----------------------|--------------|----------------------|

,

|                       |              |                      |
|-----------------------|--------------|----------------------|
| Page 11: [31] Deleted | Richard Ryan | 9/6/2007 11:02:00 AM |
|-----------------------|--------------|----------------------|

,

|                       |              |                      |
|-----------------------|--------------|----------------------|
| Page 11: [31] Deleted | Richard Ryan | 9/6/2007 11:02:00 AM |
|-----------------------|--------------|----------------------|

et

|                       |              |                      |
|-----------------------|--------------|----------------------|
| Page 11: [31] Deleted | Richard Ryan | 9/6/2007 11:40:00 AM |
|-----------------------|--------------|----------------------|

;

|                       |              |                      |
|-----------------------|--------------|----------------------|
| Page 11: [32] Deleted | Richard Ryan | 9/6/2007 11:40:00 AM |
|-----------------------|--------------|----------------------|

;

|                       |              |                     |
|-----------------------|--------------|---------------------|
| Page 11: [32] Deleted | Richard Ryan | 9/6/2007 1:19:00 PM |
|-----------------------|--------------|---------------------|

,

|                       |              |                     |
|-----------------------|--------------|---------------------|
| Page 11: [32] Deleted | Richard Ryan | 9/6/2007 1:19:00 PM |
|-----------------------|--------------|---------------------|

A

|                       |              |                      |
|-----------------------|--------------|----------------------|
| Page 11: [33] Deleted | Richard Ryan | 9/6/2007 11:02:00 AM |
|-----------------------|--------------|----------------------|

.

|                       |              |                      |
|-----------------------|--------------|----------------------|
| Page 11: [33] Deleted | Richard Ryan | 9/6/2007 11:03:00 AM |
|-----------------------|--------------|----------------------|

é

|                       |              |                      |
|-----------------------|--------------|----------------------|
| Page 11: [33] Deleted | Richard Ryan | 9/6/2007 11:03:00 AM |
|-----------------------|--------------|----------------------|

é

|                       |              |                      |
|-----------------------|--------------|----------------------|
| Page 11: [33] Deleted | Richard Ryan | 9/6/2007 11:03:00 AM |
|-----------------------|--------------|----------------------|

é

|                       |              |                      |
|-----------------------|--------------|----------------------|
| Page 11: [33] Deleted | Richard Ryan | 9/6/2007 11:03:00 AM |
|-----------------------|--------------|----------------------|

é

|                       |              |                      |
|-----------------------|--------------|----------------------|
| Page 11: [33] Deleted | Richard Ryan | 9/6/2007 11:03:00 AM |
|-----------------------|--------------|----------------------|

é

|                       |              |                      |
|-----------------------|--------------|----------------------|
| Page 11: [33] Deleted | Richard Ryan | 9/6/2007 11:03:00 AM |
|-----------------------|--------------|----------------------|

é

|                       |              |                      |
|-----------------------|--------------|----------------------|
| Page 11: [33] Deleted | Richard Ryan | 9/6/2007 11:03:00 AM |
|-----------------------|--------------|----------------------|

é

|                       |              |                      |
|-----------------------|--------------|----------------------|
| Page 11: [33] Deleted | Richard Ryan | 9/6/2007 11:03:00 AM |
|-----------------------|--------------|----------------------|

é

|                       |              |                      |
|-----------------------|--------------|----------------------|
| Page 11: [33] Deleted | Richard Ryan | 9/6/2007 11:03:00 AM |
|-----------------------|--------------|----------------------|

é

|                       |              |                      |
|-----------------------|--------------|----------------------|
| Page 11: [33] Deleted | Richard Ryan | 9/6/2007 11:03:00 AM |
|-----------------------|--------------|----------------------|

é

|                       |              |                      |
|-----------------------|--------------|----------------------|
| Page 11: [34] Deleted | Richard Ryan | 9/6/2007 11:03:00 AM |
|-----------------------|--------------|----------------------|

e

|                       |              |                      |
|-----------------------|--------------|----------------------|
| Page 11: [34] Deleted | Richard Ryan | 9/6/2007 11:23:00 AM |
|-----------------------|--------------|----------------------|

,

|                       |              |                      |
|-----------------------|--------------|----------------------|
| Page 11: [34] Deleted | Richard Ryan | 9/6/2007 11:40:00 AM |
|-----------------------|--------------|----------------------|

;

|                       |              |                      |
|-----------------------|--------------|----------------------|
| Page 11: [34] Deleted | Richard Ryan | 9/6/2007 11:23:00 AM |
|-----------------------|--------------|----------------------|

,

|                       |              |                      |
|-----------------------|--------------|----------------------|
| Page 11: [34] Deleted | Richard Ryan | 9/6/2007 11:24:00 AM |
|-----------------------|--------------|----------------------|

,

|                       |              |                      |
|-----------------------|--------------|----------------------|
| Page 11: [34] Deleted | Richard Ryan | 9/6/2007 11:40:00 AM |
|-----------------------|--------------|----------------------|

;

|                       |              |                      |
|-----------------------|--------------|----------------------|
| Page 11: [34] Deleted | Richard Ryan | 9/6/2007 11:24:00 AM |
|-----------------------|--------------|----------------------|

,

|                       |              |                     |
|-----------------------|--------------|---------------------|
| Page 11: [34] Deleted | Richard Ryan | 9/6/2007 1:20:00 PM |
|-----------------------|--------------|---------------------|

then

|                       |              |                      |
|-----------------------|--------------|----------------------|
| Page 11: [34] Deleted | Richard Ryan | 9/6/2007 11:24:00 AM |
|-----------------------|--------------|----------------------|

i

|                       |              |                      |
|-----------------------|--------------|----------------------|
| Page 11: [34] Deleted | Richard Ryan | 9/6/2007 11:24:00 AM |
|-----------------------|--------------|----------------------|

by

|                       |              |                      |
|-----------------------|--------------|----------------------|
| Page 11: [34] Deleted | Richard Ryan | 9/6/2007 11:24:00 AM |
|-----------------------|--------------|----------------------|

aqueous

|                       |              |                      |
|-----------------------|--------------|----------------------|
| Page 11: [34] Deleted | Richard Ryan | 9/6/2007 11:24:00 AM |
|-----------------------|--------------|----------------------|

,

|                       |              |                      |
|-----------------------|--------------|----------------------|
| Page 11: [34] Deleted | Richard Ryan | 9/6/2007 11:24:00 AM |
|-----------------------|--------------|----------------------|

afford

|                       |              |                      |
|-----------------------|--------------|----------------------|
| Page 11: [34] Deleted | Richard Ryan | 9/6/2007 11:24:00 AM |
|-----------------------|--------------|----------------------|

,

|                       |              |                      |
|-----------------------|--------------|----------------------|
| Page 11: [34] Deleted | Richard Ryan | 9/6/2007 10:53:00 AM |
|-----------------------|--------------|----------------------|

R<sub>f</sub>

|                       |              |                      |
|-----------------------|--------------|----------------------|
| Page 11: [35] Deleted | Richard Ryan | 9/6/2007 11:25:00 AM |
|-----------------------|--------------|----------------------|

,

|                       |              |                      |
|-----------------------|--------------|----------------------|
| Page 11: [35] Deleted | Richard Ryan | 9/6/2007 11:25:00 AM |
|-----------------------|--------------|----------------------|

S

|                       |              |                      |
|-----------------------|--------------|----------------------|
| Page 11: [35] Deleted | Richard Ryan | 9/6/2007 11:25:00 AM |
|-----------------------|--------------|----------------------|

e

|                       |              |                      |
|-----------------------|--------------|----------------------|
| Page 11: [35] Deleted | Richard Ryan | 9/6/2007 11:25:00 AM |
|-----------------------|--------------|----------------------|

,

|                       |              |                      |
|-----------------------|--------------|----------------------|
| Page 11: [35] Deleted | Richard Ryan | 9/6/2007 11:25:00 AM |
|-----------------------|--------------|----------------------|

A

|                       |              |                      |
|-----------------------|--------------|----------------------|
| Page 11: [35] Deleted | Richard Ryan | 9/6/2007 11:25:00 AM |
|-----------------------|--------------|----------------------|

e

|                       |              |                      |
|-----------------------|--------------|----------------------|
| Page 11: [35] Deleted | Richard Ryan | 9/6/2007 11:25:00 AM |
|-----------------------|--------------|----------------------|

,

|                       |              |                      |
|-----------------------|--------------|----------------------|
| Page 11: [35] Deleted | Richard Ryan | 9/6/2007 11:25:00 AM |
|-----------------------|--------------|----------------------|

,

|                       |              |                      |
|-----------------------|--------------|----------------------|
| Page 11: [35] Deleted | Richard Ryan | 9/6/2007 11:40:00 AM |
|-----------------------|--------------|----------------------|

;

|                       |              |                      |
|-----------------------|--------------|----------------------|
| Page 11: [35] Deleted | Richard Ryan | 9/6/2007 11:40:00 AM |
|-----------------------|--------------|----------------------|

;

|                       |              |                      |
|-----------------------|--------------|----------------------|
| Page 11: [35] Deleted | Richard Ryan | 9/6/2007 11:25:00 AM |
|-----------------------|--------------|----------------------|

,

|                       |              |                      |
|-----------------------|--------------|----------------------|
| Page 11: [35] Deleted | Richard Ryan | 9/6/2007 11:25:00 AM |
|-----------------------|--------------|----------------------|

,

|                       |              |                      |
|-----------------------|--------------|----------------------|
| Page 11: [35] Deleted | Richard Ryan | 9/6/2007 11:25:00 AM |
|-----------------------|--------------|----------------------|

|                       |              |                      |
|-----------------------|--------------|----------------------|
| Page 11: [35] Deleted | Richard Ryan | 9/6/2007 11:25:00 AM |
|-----------------------|--------------|----------------------|

,

|                       |              |                      |
|-----------------------|--------------|----------------------|
| Page 11: [35] Deleted | Richard Ryan | 9/6/2007 11:25:00 AM |
|-----------------------|--------------|----------------------|

et

|                       |              |                      |
|-----------------------|--------------|----------------------|
| Page 11: [35] Deleted | Richard Ryan | 9/6/2007 11:25:00 AM |
|-----------------------|--------------|----------------------|

P



|                       |              |                      |
|-----------------------|--------------|----------------------|
| Page 11: [35] Deleted | Richard Ryan | 9/6/2007 11:40:00 AM |
|-----------------------|--------------|----------------------|

,

|                       |              |                      |
|-----------------------|--------------|----------------------|
| Page 11: [35] Deleted | Richard Ryan | 9/6/2007 11:25:00 AM |
|-----------------------|--------------|----------------------|

,

|                       |              |                      |
|-----------------------|--------------|----------------------|
| Page 11: [35] Deleted | Richard Ryan | 9/6/2007 11:25:00 AM |
|-----------------------|--------------|----------------------|

et

|                       |              |                      |
|-----------------------|--------------|----------------------|
| Page 11: [35] Deleted | Richard Ryan | 9/6/2007 11:25:00 AM |
|-----------------------|--------------|----------------------|

,

|                       |              |                      |
|-----------------------|--------------|----------------------|
| Page 11: [35] Deleted | Richard Ryan | 9/6/2007 11:26:00 AM |
|-----------------------|--------------|----------------------|

,

|                       |              |                      |
|-----------------------|--------------|----------------------|
| Page 11: [35] Deleted | Richard Ryan | 9/6/2007 11:26:00 AM |
|-----------------------|--------------|----------------------|

,

|                       |              |                      |
|-----------------------|--------------|----------------------|
| Page 11: [35] Deleted | Richard Ryan | 9/6/2007 11:26:00 AM |
|-----------------------|--------------|----------------------|

,

|                       |              |                      |
|-----------------------|--------------|----------------------|
| Page 11: [35] Deleted | Richard Ryan | 9/6/2007 11:26:00 AM |
|-----------------------|--------------|----------------------|

,

|                       |              |                      |
|-----------------------|--------------|----------------------|
| Page 11: [35] Deleted | Richard Ryan | 9/6/2007 11:26:00 AM |
|-----------------------|--------------|----------------------|

,

|                       |              |                      |
|-----------------------|--------------|----------------------|
| Page 11: [35] Deleted | Richard Ryan | 9/6/2007 11:26:00 AM |
|-----------------------|--------------|----------------------|

,

|                       |              |                      |
|-----------------------|--------------|----------------------|
| Page 11: [35] Deleted | Richard Ryan | 9/6/2007 11:26:00 AM |
|-----------------------|--------------|----------------------|

,

|                       |              |                      |
|-----------------------|--------------|----------------------|
| Page 11: [35] Deleted | Richard Ryan | 9/6/2007 11:26:00 AM |
|-----------------------|--------------|----------------------|

,

|                       |              |                      |
|-----------------------|--------------|----------------------|
| Page 11: [35] Deleted | Richard Ryan | 9/6/2007 11:26:00 AM |
|-----------------------|--------------|----------------------|

,

|                       |              |                      |
|-----------------------|--------------|----------------------|
| Page 11: [35] Deleted | Richard Ryan | 9/6/2007 11:27:00 AM |
|-----------------------|--------------|----------------------|

et

|                       |              |                      |
|-----------------------|--------------|----------------------|
| Page 11: [35] Deleted | Richard Ryan | 9/6/2007 11:27:00 AM |
|-----------------------|--------------|----------------------|

,

|                       |              |                      |
|-----------------------|--------------|----------------------|
| Page 11: [35] Deleted | Richard Ryan | 9/6/2007 11:27:00 AM |
|-----------------------|--------------|----------------------|

,

|                       |              |                      |
|-----------------------|--------------|----------------------|
| Page 11: [35] Deleted | Richard Ryan | 9/6/2007 11:40:00 AM |
|-----------------------|--------------|----------------------|

;

,

|                       |              |                      |
|-----------------------|--------------|----------------------|
| Page 12: [36] Deleted | Richard Ryan | 9/6/2007 11:40:00 AM |
|-----------------------|--------------|----------------------|

;

|                       |              |                      |
|-----------------------|--------------|----------------------|
| Page 12: [36] Deleted | Richard Ryan | 9/6/2007 11:27:00 AM |
|-----------------------|--------------|----------------------|

,

|                       |              |                      |
|-----------------------|--------------|----------------------|
| Page 12: [36] Deleted | Richard Ryan | 9/6/2007 11:27:00 AM |
|-----------------------|--------------|----------------------|

,

|                       |              |                      |
|-----------------------|--------------|----------------------|
| Page 12: [36] Deleted | Richard Ryan | 9/6/2007 11:27:00 AM |
|-----------------------|--------------|----------------------|

,

|                       |              |                      |
|-----------------------|--------------|----------------------|
| Page 12: [36] Deleted | Richard Ryan | 9/6/2007 11:27:00 AM |
|-----------------------|--------------|----------------------|

,

|                       |              |                      |
|-----------------------|--------------|----------------------|
| Page 12: [36] Deleted | Richard Ryan | 9/6/2007 11:27:00 AM |
|-----------------------|--------------|----------------------|

,

|                       |              |                      |
|-----------------------|--------------|----------------------|
| Page 12: [36] Deleted | Richard Ryan | 9/6/2007 11:27:00 AM |
|-----------------------|--------------|----------------------|

,

|                       |              |                      |
|-----------------------|--------------|----------------------|
| Page 12: [36] Deleted | Richard Ryan | 9/6/2007 11:27:00 AM |
|-----------------------|--------------|----------------------|

,

|                       |              |                      |
|-----------------------|--------------|----------------------|
| Page 12: [36] Deleted | Richard Ryan | 9/6/2007 11:27:00 AM |
|-----------------------|--------------|----------------------|

,

|                       |              |                      |
|-----------------------|--------------|----------------------|
| Page 12: [36] Deleted | Richard Ryan | 9/6/2007 11:27:00 AM |
|-----------------------|--------------|----------------------|

,

|                       |              |                      |
|-----------------------|--------------|----------------------|
| Page 12: [36] Deleted | Richard Ryan | 9/6/2007 11:27:00 AM |
|-----------------------|--------------|----------------------|

,

|                       |              |                      |
|-----------------------|--------------|----------------------|
| Page 12: [36] Deleted | Richard Ryan | 9/6/2007 11:27:00 AM |
|-----------------------|--------------|----------------------|

,

|                       |              |                      |
|-----------------------|--------------|----------------------|
| Page 12: [36] Deleted | Richard Ryan | 9/6/2007 11:28:00 AM |
|-----------------------|--------------|----------------------|

,

|                       |              |                      |
|-----------------------|--------------|----------------------|
| Page 12: [36] Deleted | Richard Ryan | 9/6/2007 11:28:00 AM |
|-----------------------|--------------|----------------------|

,

|                       |              |                      |
|-----------------------|--------------|----------------------|
| Page 12: [36] Deleted | Richard Ryan | 9/6/2007 11:28:00 AM |
|-----------------------|--------------|----------------------|

,

|                       |              |                      |
|-----------------------|--------------|----------------------|
| Page 12: [36] Deleted | Richard Ryan | 9/6/2007 11:28:00 AM |
|-----------------------|--------------|----------------------|

,

|                       |              |                      |
|-----------------------|--------------|----------------------|
| Page 12: [36] Deleted | Richard Ryan | 9/6/2007 11:28:00 AM |
|-----------------------|--------------|----------------------|

,

|                       |              |                      |
|-----------------------|--------------|----------------------|
| Page 12: [36] Deleted | Richard Ryan | 9/6/2007 11:28:00 AM |
|-----------------------|--------------|----------------------|

,

|                       |              |                      |
|-----------------------|--------------|----------------------|
| Page 12: [36] Deleted | Richard Ryan | 9/6/2007 11:28:00 AM |
|-----------------------|--------------|----------------------|

,

|                       |              |                      |
|-----------------------|--------------|----------------------|
| Page 12: [36] Deleted | Richard Ryan | 9/6/2007 11:28:00 AM |
|-----------------------|--------------|----------------------|

,

|                       |              |                      |
|-----------------------|--------------|----------------------|
| Page 12: [36] Deleted | Richard Ryan | 9/6/2007 11:28:00 AM |
|-----------------------|--------------|----------------------|

P

|                       |              |                      |
|-----------------------|--------------|----------------------|
| Page 12: [36] Deleted | Richard Ryan | 9/6/2007 11:28:00 AM |
|-----------------------|--------------|----------------------|

,

|                       |              |                      |
|-----------------------|--------------|----------------------|
| Page 12: [36] Deleted | Richard Ryan | 9/6/2007 11:28:00 AM |
|-----------------------|--------------|----------------------|

,

|                       |              |                      |
|-----------------------|--------------|----------------------|
| Page 12: [36] Deleted | Richard Ryan | 9/6/2007 11:28:00 AM |
|-----------------------|--------------|----------------------|

,

|                       |              |                      |
|-----------------------|--------------|----------------------|
| Page 12: [36] Deleted | Richard Ryan | 9/6/2007 11:28:00 AM |
|-----------------------|--------------|----------------------|

u

|                       |              |                      |
|-----------------------|--------------|----------------------|
| Page 12: [36] Deleted | Richard Ryan | 9/6/2007 11:28:00 AM |
|-----------------------|--------------|----------------------|

,

|                       |              |                      |
|-----------------------|--------------|----------------------|
| Page 12: [36] Deleted | Richard Ryan | 9/6/2007 11:28:00 AM |
|-----------------------|--------------|----------------------|

,

|                       |              |                      |
|-----------------------|--------------|----------------------|
| Page 12: [36] Deleted | Richard Ryan | 9/6/2007 11:28:00 AM |
|-----------------------|--------------|----------------------|

u

|                       |              |                      |
|-----------------------|--------------|----------------------|
| Page 12: [36] Deleted | Richard Ryan | 9/6/2007 11:28:00 AM |
|-----------------------|--------------|----------------------|

,

|                       |              |                      |
|-----------------------|--------------|----------------------|
| Page 12: [36] Deleted | Richard Ryan | 9/6/2007 11:29:00 AM |
|-----------------------|--------------|----------------------|

,

|                       |              |                      |
|-----------------------|--------------|----------------------|
| Page 12: [36] Deleted | Richard Ryan | 9/6/2007 11:29:00 AM |
|-----------------------|--------------|----------------------|

,

|                       |              |                      |
|-----------------------|--------------|----------------------|
| Page 12: [36] Deleted | Richard Ryan | 9/6/2007 11:29:00 AM |
|-----------------------|--------------|----------------------|

,

|                       |              |                      |
|-----------------------|--------------|----------------------|
| Page 12: [36] Deleted | Richard Ryan | 9/6/2007 11:29:00 AM |
|-----------------------|--------------|----------------------|

,

|                       |              |                      |
|-----------------------|--------------|----------------------|
| Page 12: [36] Deleted | Richard Ryan | 9/6/2007 11:29:00 AM |
|-----------------------|--------------|----------------------|

,

|                       |              |                      |
|-----------------------|--------------|----------------------|
| Page 12: [36] Deleted | Richard Ryan | 9/6/2007 11:29:00 AM |
|-----------------------|--------------|----------------------|

,

|                       |              |                      |
|-----------------------|--------------|----------------------|
| Page 12: [36] Deleted | Richard Ryan | 9/6/2007 11:29:00 AM |
|-----------------------|--------------|----------------------|

,

|                       |              |                      |
|-----------------------|--------------|----------------------|
| Page 12: [36] Deleted | Richard Ryan | 9/6/2007 11:29:00 AM |
|-----------------------|--------------|----------------------|

,

|                       |              |                      |
|-----------------------|--------------|----------------------|
| Page 12: [36] Deleted | Richard Ryan | 9/6/2007 11:29:00 AM |
|-----------------------|--------------|----------------------|

et

|                       |              |                      |
|-----------------------|--------------|----------------------|
| Page 12: [36] Deleted | Richard Ryan | 9/6/2007 11:29:00 AM |
|-----------------------|--------------|----------------------|

,

|                       |              |                      |
|-----------------------|--------------|----------------------|
| Page 12: [36] Deleted | Richard Ryan | 9/6/2007 11:29:00 AM |
|-----------------------|--------------|----------------------|

,

|                       |              |                      |
|-----------------------|--------------|----------------------|
| Page 12: [36] Deleted | Richard Ryan | 9/6/2007 11:29:00 AM |
|-----------------------|--------------|----------------------|

et

|                       |              |                      |
|-----------------------|--------------|----------------------|
| Page 12: [36] Deleted | Richard Ryan | 9/6/2007 11:40:00 AM |
|-----------------------|--------------|----------------------|

;

|                       |              |                      |
|-----------------------|--------------|----------------------|
| Page 12: [37] Deleted | Richard Ryan | 9/6/2007 11:40:00 AM |
|-----------------------|--------------|----------------------|

;

|                       |              |                      |
|-----------------------|--------------|----------------------|
| Page 12: [37] Deleted | Richard Ryan | 9/6/2007 11:29:00 AM |
|-----------------------|--------------|----------------------|

,

|                       |              |                     |
|-----------------------|--------------|---------------------|
| Page 12: [37] Deleted | Richard Ryan | 9/6/2007 1:23:00 PM |
|-----------------------|--------------|---------------------|

A

|                       |              |                      |
|-----------------------|--------------|----------------------|
| Page 12: [37] Deleted | Richard Ryan | 9/6/2007 11:29:00 AM |
|-----------------------|--------------|----------------------|

,

|                       |              |                      |
|-----------------------|--------------|----------------------|
| Page 12: [38] Deleted | Richard Ryan | 9/6/2007 11:29:00 AM |
|-----------------------|--------------|----------------------|

.

|                       |              |                      |
|-----------------------|--------------|----------------------|
| Page 12: [38] Deleted | Richard Ryan | 9/6/2007 11:30:00 AM |
|-----------------------|--------------|----------------------|

é

|                       |              |                      |
|-----------------------|--------------|----------------------|
| Page 12: [38] Deleted | Richard Ryan | 9/6/2007 11:30:00 AM |
|-----------------------|--------------|----------------------|

é

|                       |              |                      |
|-----------------------|--------------|----------------------|
| Page 12: [38] Deleted | Richard Ryan | 9/6/2007 11:30:00 AM |
|-----------------------|--------------|----------------------|

é

|                       |              |                      |
|-----------------------|--------------|----------------------|
| Page 12: [38] Deleted | Richard Ryan | 9/6/2007 11:30:00 AM |
|-----------------------|--------------|----------------------|

é

|                       |              |                      |
|-----------------------|--------------|----------------------|
| Page 12: [38] Deleted | Richard Ryan | 9/6/2007 11:30:00 AM |
|-----------------------|--------------|----------------------|

é

|                       |              |                      |
|-----------------------|--------------|----------------------|
| Page 12: [38] Deleted | Richard Ryan | 9/6/2007 11:30:00 AM |
|-----------------------|--------------|----------------------|

é

|                       |              |                      |
|-----------------------|--------------|----------------------|
| Page 12: [38] Deleted | Richard Ryan | 9/6/2007 11:30:00 AM |
|-----------------------|--------------|----------------------|

é

|                       |              |                      |
|-----------------------|--------------|----------------------|
| Page 12: [38] Deleted | Richard Ryan | 9/6/2007 11:30:00 AM |
|-----------------------|--------------|----------------------|

é

|                       |              |                      |
|-----------------------|--------------|----------------------|
| Page 12: [39] Deleted | Richard Ryan | 9/6/2007 11:30:00 AM |
|-----------------------|--------------|----------------------|

,

|                       |              |                      |
|-----------------------|--------------|----------------------|
| Page 12: [39] Deleted | Richard Ryan | 9/6/2007 11:30:00 AM |
|-----------------------|--------------|----------------------|

é

|                       |              |                      |
|-----------------------|--------------|----------------------|
| Page 12: [39] Deleted | Richard Ryan | 9/6/2007 11:30:00 AM |
|-----------------------|--------------|----------------------|

,

|                       |              |                      |
|-----------------------|--------------|----------------------|
| Page 12: [39] Deleted | Richard Ryan | 9/6/2007 11:30:00 AM |
|-----------------------|--------------|----------------------|

under



|                       |              |                      |
|-----------------------|--------------|----------------------|
| Page 12: [39] Deleted | Richard Ryan | 9/6/2007 11:30:00 AM |
|-----------------------|--------------|----------------------|

é

|                       |              |                      |
|-----------------------|--------------|----------------------|
| Page 12: [39] Deleted | Richard Ryan | 9/6/2007 11:31:00 AM |
|-----------------------|--------------|----------------------|

,

|                       |              |                      |
|-----------------------|--------------|----------------------|
| Page 12: [39] Deleted | Richard Ryan | 9/6/2007 11:31:00 AM |
|-----------------------|--------------|----------------------|

,

|                       |              |                      |
|-----------------------|--------------|----------------------|
| Page 12: [39] Deleted | Richard Ryan | 9/6/2007 11:31:00 AM |
|-----------------------|--------------|----------------------|

then

|                       |              |                      |
|-----------------------|--------------|----------------------|
| Page 12: [39] Deleted | Richard Ryan | 9/6/2007 11:31:00 AM |
|-----------------------|--------------|----------------------|

at

|                       |              |                      |
|-----------------------|--------------|----------------------|
| Page 12: [39] Deleted | Richard Ryan | 9/6/2007 11:31:00 AM |
|-----------------------|--------------|----------------------|

the

|                       |              |                      |
|-----------------------|--------------|----------------------|
| Page 12: [39] Deleted | Richard Ryan | 9/6/2007 11:31:00 AM |
|-----------------------|--------------|----------------------|

tion

|                       |              |                      |
|-----------------------|--------------|----------------------|
| Page 12: [39] Deleted | Richard Ryan | 9/6/2007 11:31:00 AM |
|-----------------------|--------------|----------------------|

of

|                       |              |                      |
|-----------------------|--------------|----------------------|
| Page 12: [39] Deleted | Richard Ryan | 9/6/2007 11:31:00 AM |
|-----------------------|--------------|----------------------|

exceed

|                       |              |                      |
|-----------------------|--------------|----------------------|
| Page 12: [39] Deleted | Richard Ryan | 9/6/2007 11:31:00 AM |
|-----------------------|--------------|----------------------|

of

|                       |              |                      |
|-----------------------|--------------|----------------------|
| Page 12: [39] Deleted | Richard Ryan | 9/6/2007 11:31:00 AM |
|-----------------------|--------------|----------------------|

X

|                       |              |                      |
|-----------------------|--------------|----------------------|
| Page 12: [39] Deleted | Richard Ryan | 9/6/2007 11:31:00 AM |
|-----------------------|--------------|----------------------|

was

|                       |              |                      |
|-----------------------|--------------|----------------------|
| Page 12: [39] Deleted | Richard Ryan | 9/6/2007 11:31:00 AM |
|-----------------------|--------------|----------------------|

afford

|                       |              |                      |
|-----------------------|--------------|----------------------|
| Page 12: [39] Deleted | Richard Ryan | 9/6/2007 11:32:00 AM |
|-----------------------|--------------|----------------------|

,

|                       |              |                      |
|-----------------------|--------------|----------------------|
| Page 12: [39] Deleted | Richard Ryan | 9/6/2007 10:53:00 AM |
|-----------------------|--------------|----------------------|

$R_f$

|                       |              |                      |
|-----------------------|--------------|----------------------|
| Page 12: [40] Deleted | Richard Ryan | 9/6/2007 11:32:00 AM |
|-----------------------|--------------|----------------------|

,

|                       |              |                      |
|-----------------------|--------------|----------------------|
| Page 12: [40] Deleted | Richard Ryan | 9/6/2007 11:32:00 AM |
|-----------------------|--------------|----------------------|

A

|                       |              |                      |
|-----------------------|--------------|----------------------|
| Page 12: [40] Deleted | Richard Ryan | 9/6/2007 11:32:00 AM |
|-----------------------|--------------|----------------------|

e

|                       |              |                      |
|-----------------------|--------------|----------------------|
| Page 12: [40] Deleted | Richard Ryan | 9/6/2007 11:40:00 AM |
|-----------------------|--------------|----------------------|

;

|                       |              |                      |
|-----------------------|--------------|----------------------|
| Page 12: [40] Deleted | Richard Ryan | 9/6/2007 11:32:00 AM |
|-----------------------|--------------|----------------------|

,

|                       |              |                      |
|-----------------------|--------------|----------------------|
| Page 12: [40] Deleted | Richard Ryan | 9/6/2007 11:32:00 AM |
|-----------------------|--------------|----------------------|

,

|                       |              |                      |
|-----------------------|--------------|----------------------|
| Page 12: [40] Deleted | Richard Ryan | 9/6/2007 11:32:00 AM |
|-----------------------|--------------|----------------------|

,

|                       |              |                      |
|-----------------------|--------------|----------------------|
| Page 12: [40] Deleted | Richard Ryan | 9/6/2007 11:32:00 AM |
|-----------------------|--------------|----------------------|

et

|                       |              |                      |
|-----------------------|--------------|----------------------|
| Page 12: [40] Deleted | Richard Ryan | 9/6/2007 11:40:00 AM |
|-----------------------|--------------|----------------------|

;

|                       |              |                      |
|-----------------------|--------------|----------------------|
| Page 12: [40] Deleted | Richard Ryan | 9/6/2007 11:32:00 AM |
|-----------------------|--------------|----------------------|

,

|                       |              |                      |
|-----------------------|--------------|----------------------|
| Page 12: [40] Deleted | Richard Ryan | 9/6/2007 11:32:00 AM |
|-----------------------|--------------|----------------------|

et

|                       |              |                      |
|-----------------------|--------------|----------------------|
| Page 12: [40] Deleted | Richard Ryan | 9/6/2007 11:32:00 AM |
|-----------------------|--------------|----------------------|

,

|                       |              |                      |
|-----------------------|--------------|----------------------|
| Page 12: [40] Deleted | Richard Ryan | 9/6/2007 11:32:00 AM |
|-----------------------|--------------|----------------------|

et

|                       |              |                      |
|-----------------------|--------------|----------------------|
| Page 12: [40] Deleted | Richard Ryan | 9/6/2007 11:32:00 AM |
|-----------------------|--------------|----------------------|

,

|                       |              |                      |
|-----------------------|--------------|----------------------|
| Page 12: [40] Deleted | Richard Ryan | 9/6/2007 11:32:00 AM |
|-----------------------|--------------|----------------------|

P

|                       |              |                      |
|-----------------------|--------------|----------------------|
| Page 12: [40] Deleted | Richard Ryan | 9/6/2007 11:40:00 AM |
|-----------------------|--------------|----------------------|

;

|                       |              |                      |
|-----------------------|--------------|----------------------|
| Page 12: [40] Deleted | Richard Ryan | 9/6/2007 11:32:00 AM |
|-----------------------|--------------|----------------------|

,

|                       |              |                      |
|-----------------------|--------------|----------------------|
| Page 12: [40] Deleted | Richard Ryan | 9/6/2007 11:32:00 AM |
|-----------------------|--------------|----------------------|

|                       |              |                      |
|-----------------------|--------------|----------------------|
| Page 12: [40] Deleted | Richard Ryan | 9/6/2007 11:33:00 AM |
|-----------------------|--------------|----------------------|

,

|                       |              |                      |
|-----------------------|--------------|----------------------|
| Page 12: [40] Deleted | Richard Ryan | 9/6/2007 11:33:00 AM |
|-----------------------|--------------|----------------------|

T

|                       |              |                      |
|-----------------------|--------------|----------------------|
| Page 12: [40] Deleted | Richard Ryan | 9/6/2007 11:33:00 AM |
|-----------------------|--------------|----------------------|

,

|                       |              |                      |
|-----------------------|--------------|----------------------|
| Page 12: [40] Deleted | Richard Ryan | 9/6/2007 11:33:00 AM |
|-----------------------|--------------|----------------------|

,

|                       |              |                      |
|-----------------------|--------------|----------------------|
| Page 12: [40] Deleted | Richard Ryan | 9/6/2007 11:33:00 AM |
|-----------------------|--------------|----------------------|

,

|                       |              |                      |
|-----------------------|--------------|----------------------|
| Page 12: [40] Deleted | Richard Ryan | 9/6/2007 11:33:00 AM |
|-----------------------|--------------|----------------------|

,

|                       |              |                      |
|-----------------------|--------------|----------------------|
| Page 12: [40] Deleted | Richard Ryan | 9/6/2007 11:33:00 AM |
|-----------------------|--------------|----------------------|

,

|                       |              |                      |
|-----------------------|--------------|----------------------|
| Page 12: [40] Deleted | Richard Ryan | 9/6/2007 11:33:00 AM |
|-----------------------|--------------|----------------------|

,

|                       |              |                      |
|-----------------------|--------------|----------------------|
| Page 12: [40] Deleted | Richard Ryan | 9/6/2007 11:33:00 AM |
|-----------------------|--------------|----------------------|

,

|                       |              |                      |
|-----------------------|--------------|----------------------|
| Page 12: [40] Deleted | Richard Ryan | 9/6/2007 11:33:00 AM |
|-----------------------|--------------|----------------------|

,

|                       |              |                      |
|-----------------------|--------------|----------------------|
| Page 12: [40] Deleted | Richard Ryan | 9/6/2007 11:33:00 AM |
|-----------------------|--------------|----------------------|

,

|                       |              |                      |
|-----------------------|--------------|----------------------|
| Page 12: [40] Deleted | Richard Ryan | 9/6/2007 11:33:00 AM |
|-----------------------|--------------|----------------------|

,

|                       |              |                      |
|-----------------------|--------------|----------------------|
| Page 12: [40] Deleted | Richard Ryan | 9/6/2007 11:33:00 AM |
|-----------------------|--------------|----------------------|

,

|                       |              |                      |
|-----------------------|--------------|----------------------|
| Page 12: [40] Deleted | Richard Ryan | 9/6/2007 11:33:00 AM |
|-----------------------|--------------|----------------------|

,

|                       |              |                      |
|-----------------------|--------------|----------------------|
| Page 12: [40] Deleted | Richard Ryan | 9/6/2007 11:33:00 AM |
|-----------------------|--------------|----------------------|

,

|                       |              |                      |
|-----------------------|--------------|----------------------|
| Page 12: [40] Deleted | Richard Ryan | 9/6/2007 11:40:00 AM |
|-----------------------|--------------|----------------------|

;

|                       |              |                      |
|-----------------------|--------------|----------------------|
| Page 12: [40] Deleted | Richard Ryan | 9/6/2007 11:33:00 AM |
|-----------------------|--------------|----------------------|

,

|                       |              |                      |
|-----------------------|--------------|----------------------|
| Page 12: [40] Deleted | Richard Ryan | 9/6/2007 11:40:00 AM |
|-----------------------|--------------|----------------------|

;

|                       |              |                      |
|-----------------------|--------------|----------------------|
| Page 12: [40] Deleted | Richard Ryan | 9/6/2007 11:34:00 AM |
|-----------------------|--------------|----------------------|

,

|                       |              |                      |
|-----------------------|--------------|----------------------|
| Page 12: [40] Deleted | Richard Ryan | 9/6/2007 11:34:00 AM |
|-----------------------|--------------|----------------------|

,

|                       |              |                      |
|-----------------------|--------------|----------------------|
| Page 12: [40] Deleted | Richard Ryan | 9/6/2007 11:34:00 AM |
|-----------------------|--------------|----------------------|

,

|                       |              |                      |
|-----------------------|--------------|----------------------|
| Page 12: [40] Deleted | Richard Ryan | 9/6/2007 11:34:00 AM |
|-----------------------|--------------|----------------------|

,

|                       |              |                      |
|-----------------------|--------------|----------------------|
| Page 12: [40] Deleted | Richard Ryan | 9/6/2007 11:34:00 AM |
|-----------------------|--------------|----------------------|

,

|                       |              |                      |
|-----------------------|--------------|----------------------|
| Page 12: [40] Deleted | Richard Ryan | 9/6/2007 11:34:00 AM |
|-----------------------|--------------|----------------------|

,

|                       |              |                      |
|-----------------------|--------------|----------------------|
| Page 12: [40] Deleted | Richard Ryan | 9/6/2007 11:34:00 AM |
|-----------------------|--------------|----------------------|

,

|                       |              |                      |
|-----------------------|--------------|----------------------|
| Page 12: [40] Deleted | Richard Ryan | 9/6/2007 11:34:00 AM |
|-----------------------|--------------|----------------------|

,

|                       |              |                      |
|-----------------------|--------------|----------------------|
| Page 12: [40] Deleted | Richard Ryan | 9/6/2007 11:34:00 AM |
|-----------------------|--------------|----------------------|

,

|                       |              |                      |
|-----------------------|--------------|----------------------|
| Page 12: [40] Deleted | Richard Ryan | 9/6/2007 11:34:00 AM |
|-----------------------|--------------|----------------------|

,

|                       |              |                      |
|-----------------------|--------------|----------------------|
| Page 12: [40] Deleted | Richard Ryan | 9/6/2007 11:34:00 AM |
|-----------------------|--------------|----------------------|

,

|                       |              |                      |
|-----------------------|--------------|----------------------|
| Page 12: [40] Deleted | Richard Ryan | 9/6/2007 11:34:00 AM |
|-----------------------|--------------|----------------------|

,

|                       |              |                      |
|-----------------------|--------------|----------------------|
| Page 12: [40] Deleted | Richard Ryan | 9/6/2007 11:34:00 AM |
|-----------------------|--------------|----------------------|

,

|                       |              |                      |
|-----------------------|--------------|----------------------|
| Page 12: [40] Deleted | Richard Ryan | 9/6/2007 11:34:00 AM |
|-----------------------|--------------|----------------------|

,

|                       |              |                      |
|-----------------------|--------------|----------------------|
| Page 12: [40] Deleted | Richard Ryan | 9/6/2007 11:34:00 AM |
|-----------------------|--------------|----------------------|

,

|                       |              |                      |
|-----------------------|--------------|----------------------|
| Page 12: [40] Deleted | Richard Ryan | 9/6/2007 11:34:00 AM |
|-----------------------|--------------|----------------------|

,

|                              |                     |                             |
|------------------------------|---------------------|-----------------------------|
| <b>Page 12: [40] Deleted</b> | <b>Richard Ryan</b> | <b>9/6/2007 11:34:00 AM</b> |
|------------------------------|---------------------|-----------------------------|

,

|                              |                     |                             |
|------------------------------|---------------------|-----------------------------|
| <b>Page 12: [40] Deleted</b> | <b>Richard Ryan</b> | <b>9/6/2007 11:34:00 AM</b> |
|------------------------------|---------------------|-----------------------------|

,

|                              |                     |                             |
|------------------------------|---------------------|-----------------------------|
| <b>Page 12: [40] Deleted</b> | <b>Richard Ryan</b> | <b>9/6/2007 11:34:00 AM</b> |
|------------------------------|---------------------|-----------------------------|

,

|                              |                     |                             |
|------------------------------|---------------------|-----------------------------|
| <b>Page 13: [41] Deleted</b> | <b>Richard Ryan</b> | <b>9/6/2007 11:35:00 AM</b> |
|------------------------------|---------------------|-----------------------------|

,

|                              |                     |                             |
|------------------------------|---------------------|-----------------------------|
| <b>Page 13: [41] Deleted</b> | <b>Richard Ryan</b> | <b>9/6/2007 11:35:00 AM</b> |
|------------------------------|---------------------|-----------------------------|

,

|                              |                     |                             |
|------------------------------|---------------------|-----------------------------|
| <b>Page 13: [41] Deleted</b> | <b>Richard Ryan</b> | <b>9/6/2007 11:35:00 AM</b> |
|------------------------------|---------------------|-----------------------------|

u

|                              |                     |                             |
|------------------------------|---------------------|-----------------------------|
| <b>Page 13: [41] Deleted</b> | <b>Richard Ryan</b> | <b>9/6/2007 11:35:00 AM</b> |
|------------------------------|---------------------|-----------------------------|

,

|                              |                     |                             |
|------------------------------|---------------------|-----------------------------|
| <b>Page 13: [41] Deleted</b> | <b>Richard Ryan</b> | <b>9/6/2007 11:35:00 AM</b> |
|------------------------------|---------------------|-----------------------------|

u

|                              |                     |                             |
|------------------------------|---------------------|-----------------------------|
| <b>Page 13: [41] Deleted</b> | <b>Richard Ryan</b> | <b>9/6/2007 11:35:00 AM</b> |
|------------------------------|---------------------|-----------------------------|

,



|                       |              |                      |
|-----------------------|--------------|----------------------|
| Page 13: [41] Deleted | Richard Ryan | 9/6/2007 11:35:00 AM |
|-----------------------|--------------|----------------------|

,

|                       |              |                      |
|-----------------------|--------------|----------------------|
| Page 13: [41] Deleted | Richard Ryan | 9/6/2007 11:40:00 AM |
|-----------------------|--------------|----------------------|

.

|                       |              |                      |
|-----------------------|--------------|----------------------|
| Page 13: [41] Deleted | Richard Ryan | 9/6/2007 11:35:00 AM |
|-----------------------|--------------|----------------------|

,

|                       |              |                      |
|-----------------------|--------------|----------------------|
| Page 13: [41] Deleted | Richard Ryan | 9/6/2007 11:40:00 AM |
|-----------------------|--------------|----------------------|

.

|                       |              |                      |
|-----------------------|--------------|----------------------|
| Page 13: [41] Deleted | Richard Ryan | 9/6/2007 11:35:00 AM |
|-----------------------|--------------|----------------------|

,

|                       |              |                      |
|-----------------------|--------------|----------------------|
| Page 13: [41] Deleted | Richard Ryan | 9/6/2007 11:35:00 AM |
|-----------------------|--------------|----------------------|

,

|                       |              |                      |
|-----------------------|--------------|----------------------|
| Page 13: [41] Deleted | Richard Ryan | 9/6/2007 11:40:00 AM |
|-----------------------|--------------|----------------------|

.

|                       |              |                      |
|-----------------------|--------------|----------------------|
| Page 13: [41] Deleted | Richard Ryan | 9/6/2007 11:35:00 AM |
|-----------------------|--------------|----------------------|

,

|                       |              |                      |
|-----------------------|--------------|----------------------|
| Page 13: [41] Deleted | Richard Ryan | 9/6/2007 11:40:00 AM |
|-----------------------|--------------|----------------------|

.

|                       |              |                      |
|-----------------------|--------------|----------------------|
| Page 13: [41] Deleted | Richard Ryan | 9/6/2007 11:35:00 AM |
|-----------------------|--------------|----------------------|

,

|                       |              |                      |
|-----------------------|--------------|----------------------|
| Page 13: [41] Deleted | Richard Ryan | 9/6/2007 11:40:00 AM |
|-----------------------|--------------|----------------------|

;

|                       |              |                      |
|-----------------------|--------------|----------------------|
| Page 13: [41] Deleted | Richard Ryan | 9/6/2007 11:35:00 AM |
|-----------------------|--------------|----------------------|

,

|                       |              |                      |
|-----------------------|--------------|----------------------|
| Page 13: [41] Deleted | Richard Ryan | 9/6/2007 11:35:00 AM |
|-----------------------|--------------|----------------------|

,

|                       |              |                      |
|-----------------------|--------------|----------------------|
| Page 13: [41] Deleted | Richard Ryan | 9/6/2007 11:35:00 AM |
|-----------------------|--------------|----------------------|

et

|                       |              |                      |
|-----------------------|--------------|----------------------|
| Page 13: [41] Deleted | Richard Ryan | 9/6/2007 11:35:00 AM |
|-----------------------|--------------|----------------------|

,

|                       |              |                      |
|-----------------------|--------------|----------------------|
| Page 13: [41] Deleted | Richard Ryan | 9/6/2007 11:40:00 AM |
|-----------------------|--------------|----------------------|

;

|                       |              |                      |
|-----------------------|--------------|----------------------|
| Page 13: [41] Deleted | Richard Ryan | 9/6/2007 11:35:00 AM |
|-----------------------|--------------|----------------------|

,

|                       |              |                      |
|-----------------------|--------------|----------------------|
| Page 13: [41] Deleted | Richard Ryan | 9/6/2007 11:35:00 AM |
|-----------------------|--------------|----------------------|

,

|                       |              |                      |
|-----------------------|--------------|----------------------|
| Page 13: [41] Deleted | Richard Ryan | 9/6/2007 11:40:00 AM |
|-----------------------|--------------|----------------------|

;

|                       |              |                      |
|-----------------------|--------------|----------------------|
| Page 13: [42] Deleted | Richard Ryan | 9/6/2007 11:40:00 AM |
|-----------------------|--------------|----------------------|

;

|                       |              |                      |
|-----------------------|--------------|----------------------|
| Page 13: [42] Deleted | Richard Ryan | 9/6/2007 11:36:00 AM |
|-----------------------|--------------|----------------------|

,

|                       |              |                     |
|-----------------------|--------------|---------------------|
| Page 13: [42] Deleted | Richard Ryan | 9/6/2007 1:25:00 PM |
|-----------------------|--------------|---------------------|

Anal

|                       |              |                      |
|-----------------------|--------------|----------------------|
| Page 13: [42] Deleted | Richard Ryan | 9/6/2007 11:36:00 AM |
|-----------------------|--------------|----------------------|

,

|                       |              |                      |
|-----------------------|--------------|----------------------|
| Page 13: [43] Deleted | Richard Ryan | 9/6/2007 11:36:00 AM |
|-----------------------|--------------|----------------------|

é

|                       |              |                      |
|-----------------------|--------------|----------------------|
| Page 13: [43] Deleted | Richard Ryan | 9/6/2007 11:36:00 AM |
|-----------------------|--------------|----------------------|

é

|                       |              |                      |
|-----------------------|--------------|----------------------|
| Page 13: [43] Deleted | Richard Ryan | 9/6/2007 11:36:00 AM |
|-----------------------|--------------|----------------------|

é

|                       |              |                      |
|-----------------------|--------------|----------------------|
| Page 13: [43] Deleted | Richard Ryan | 9/6/2007 11:36:00 AM |
|-----------------------|--------------|----------------------|

é

|                       |              |                      |
|-----------------------|--------------|----------------------|
| Page 13: [43] Deleted | Richard Ryan | 9/6/2007 11:36:00 AM |
|-----------------------|--------------|----------------------|

é

|                       |              |                      |
|-----------------------|--------------|----------------------|
| Page 13: [43] Deleted | Richard Ryan | 9/6/2007 11:36:00 AM |
|-----------------------|--------------|----------------------|

é

|                       |              |                      |
|-----------------------|--------------|----------------------|
| Page 13: [43] Deleted | Richard Ryan | 9/6/2007 11:36:00 AM |
|-----------------------|--------------|----------------------|

é

|                       |              |                      |
|-----------------------|--------------|----------------------|
| Page 13: [44] Deleted | Richard Ryan | 9/6/2007 11:39:00 AM |
|-----------------------|--------------|----------------------|

é

|                       |              |                      |
|-----------------------|--------------|----------------------|
| Page 13: [44] Deleted | Richard Ryan | 9/6/2007 11:39:00 AM |
|-----------------------|--------------|----------------------|

,

|                       |              |                      |
|-----------------------|--------------|----------------------|
| Page 13: [44] Deleted | Richard Ryan | 9/6/2007 11:39:00 AM |
|-----------------------|--------------|----------------------|

,

|                       |              |                      |
|-----------------------|--------------|----------------------|
| Page 13: [44] Deleted | Richard Ryan | 9/6/2007 11:39:00 AM |
|-----------------------|--------------|----------------------|

following

|                       |              |                      |
|-----------------------|--------------|----------------------|
| Page 13: [44] Deleted | Richard Ryan | 9/6/2007 11:39:00 AM |
|-----------------------|--------------|----------------------|

the addition of

|                       |              |                      |
|-----------------------|--------------|----------------------|
| Page 13: [44] Deleted | Richard Ryan | 9/6/2007 11:39:00 AM |
|-----------------------|--------------|----------------------|

exceed

|                       |              |                      |
|-----------------------|--------------|----------------------|
| Page 13: [44] Deleted | Richard Ryan | 9/6/2007 11:39:00 AM |
|-----------------------|--------------|----------------------|

of

|                       |              |                      |
|-----------------------|--------------|----------------------|
| Page 13: [44] Deleted | Richard Ryan | 9/6/2007 11:39:00 AM |
|-----------------------|--------------|----------------------|

x

|                       |              |                      |
|-----------------------|--------------|----------------------|
| Page 13: [44] Deleted | Richard Ryan | 9/6/2007 11:40:00 AM |
|-----------------------|--------------|----------------------|

i

|                       |              |                      |
|-----------------------|--------------|----------------------|
| Page 13: [44] Deleted | Richard Ryan | 9/6/2007 11:40:00 AM |
|-----------------------|--------------|----------------------|

afford

|                       |              |                      |
|-----------------------|--------------|----------------------|
| Page 13: [44] Deleted | Richard Ryan | 9/6/2007 11:40:00 AM |
|-----------------------|--------------|----------------------|

,

|                       |              |                      |
|-----------------------|--------------|----------------------|
| Page 13: [44] Deleted | Richard Ryan | 9/6/2007 11:40:00 AM |
|-----------------------|--------------|----------------------|

|                       |              |                      |
|-----------------------|--------------|----------------------|
| Page 13: [44] Deleted | Richard Ryan | 9/6/2007 10:53:00 AM |
|-----------------------|--------------|----------------------|

$R_f$

|                       |              |                      |
|-----------------------|--------------|----------------------|
| Page 13: [45] Deleted | Richard Ryan | 9/6/2007 11:40:00 AM |
|-----------------------|--------------|----------------------|

,

|                       |              |                      |
|-----------------------|--------------|----------------------|
| Page 13: [45] Deleted | Richard Ryan | 9/6/2007 11:40:00 AM |
|-----------------------|--------------|----------------------|

A

|                       |              |                      |
|-----------------------|--------------|----------------------|
| Page 13: [45] Deleted | Richard Ryan | 9/6/2007 11:40:00 AM |
|-----------------------|--------------|----------------------|

e

|                       |              |                      |
|-----------------------|--------------|----------------------|
| Page 13: [45] Deleted | Richard Ryan | 9/6/2007 11:40:00 AM |
|-----------------------|--------------|----------------------|

;

|                       |              |                      |
|-----------------------|--------------|----------------------|
| Page 13: [45] Deleted | Richard Ryan | 9/6/2007 11:40:00 AM |
|-----------------------|--------------|----------------------|

,

|                       |              |                      |
|-----------------------|--------------|----------------------|
| Page 13: [45] Deleted | Richard Ryan | 9/6/2007 11:40:00 AM |
|-----------------------|--------------|----------------------|

et

|                       |              |                      |
|-----------------------|--------------|----------------------|
| Page 13: [45] Deleted | Richard Ryan | 9/6/2007 11:40:00 AM |
|-----------------------|--------------|----------------------|

,

|                       |              |                      |
|-----------------------|--------------|----------------------|
| Page 13: [45] Deleted | Richard Ryan | 9/6/2007 11:40:00 AM |
|-----------------------|--------------|----------------------|

et

|                       |              |                      |
|-----------------------|--------------|----------------------|
| Page 13: [45] Deleted | Richard Ryan | 9/6/2007 11:40:00 AM |
|-----------------------|--------------|----------------------|

;

|                       |              |                      |
|-----------------------|--------------|----------------------|
| Page 13: [45] Deleted | Richard Ryan | 9/6/2007 11:41:00 AM |
|-----------------------|--------------|----------------------|

,

|                       |              |                      |
|-----------------------|--------------|----------------------|
| Page 13: [45] Deleted | Richard Ryan | 9/6/2007 11:41:00 AM |
|-----------------------|--------------|----------------------|

P

|                       |              |                      |
|-----------------------|--------------|----------------------|
| Page 13: [45] Deleted | Richard Ryan | 9/6/2007 11:40:00 AM |
|-----------------------|--------------|----------------------|

;

|                       |              |                      |
|-----------------------|--------------|----------------------|
| Page 13: [45] Deleted | Richard Ryan | 9/6/2007 11:41:00 AM |
|-----------------------|--------------|----------------------|

,

|                       |              |                      |
|-----------------------|--------------|----------------------|
| Page 13: [45] Deleted | Richard Ryan | 9/6/2007 11:41:00 AM |
|-----------------------|--------------|----------------------|

,

|                       |              |                      |
|-----------------------|--------------|----------------------|
| Page 13: [45] Deleted | Richard Ryan | 9/6/2007 11:41:00 AM |
|-----------------------|--------------|----------------------|

,

|                       |              |                      |
|-----------------------|--------------|----------------------|
| Page 13: [45] Deleted | Richard Ryan | 9/6/2007 11:41:00 AM |
|-----------------------|--------------|----------------------|

,

|                       |              |                      |
|-----------------------|--------------|----------------------|
| Page 13: [45] Deleted | Richard Ryan | 9/6/2007 11:41:00 AM |
|-----------------------|--------------|----------------------|

,

|                       |              |                      |
|-----------------------|--------------|----------------------|
| Page 13: [45] Deleted | Richard Ryan | 9/6/2007 11:41:00 AM |
|-----------------------|--------------|----------------------|

,

|                       |              |                      |
|-----------------------|--------------|----------------------|
| Page 13: [45] Deleted | Richard Ryan | 9/6/2007 11:41:00 AM |
|-----------------------|--------------|----------------------|

,

|                       |              |                      |
|-----------------------|--------------|----------------------|
| Page 13: [45] Deleted | Richard Ryan | 9/6/2007 11:41:00 AM |
|-----------------------|--------------|----------------------|

,

|                       |              |                      |
|-----------------------|--------------|----------------------|
| Page 13: [45] Deleted | Richard Ryan | 9/6/2007 11:41:00 AM |
|-----------------------|--------------|----------------------|

,

|                       |              |                      |
|-----------------------|--------------|----------------------|
| Page 13: [45] Deleted | Richard Ryan | 9/6/2007 11:41:00 AM |
|-----------------------|--------------|----------------------|

,

|                       |              |                      |
|-----------------------|--------------|----------------------|
| Page 13: [45] Deleted | Richard Ryan | 9/6/2007 11:41:00 AM |
|-----------------------|--------------|----------------------|

,

|                       |              |                      |
|-----------------------|--------------|----------------------|
| Page 13: [45] Deleted | Richard Ryan | 9/6/2007 11:41:00 AM |
|-----------------------|--------------|----------------------|

,

|                              |                     |                             |
|------------------------------|---------------------|-----------------------------|
| <b>Page 13: [45] Deleted</b> | <b>Richard Ryan</b> | <b>9/6/2007 11:41:00 AM</b> |
|------------------------------|---------------------|-----------------------------|

,

|                              |                     |                             |
|------------------------------|---------------------|-----------------------------|
| <b>Page 13: [45] Deleted</b> | <b>Richard Ryan</b> | <b>9/6/2007 11:41:00 AM</b> |
|------------------------------|---------------------|-----------------------------|

,

|                              |                     |                             |
|------------------------------|---------------------|-----------------------------|
| <b>Page 13: [45] Deleted</b> | <b>Richard Ryan</b> | <b>9/6/2007 11:42:00 AM</b> |
|------------------------------|---------------------|-----------------------------|

,

|                              |                     |                             |
|------------------------------|---------------------|-----------------------------|
| <b>Page 13: [45] Deleted</b> | <b>Richard Ryan</b> | <b>9/6/2007 11:40:00 AM</b> |
|------------------------------|---------------------|-----------------------------|

,

|                              |                     |                             |
|------------------------------|---------------------|-----------------------------|
| <b>Page 13: [45] Deleted</b> | <b>Richard Ryan</b> | <b>9/6/2007 11:42:00 AM</b> |
|------------------------------|---------------------|-----------------------------|

,

|                              |                     |                             |
|------------------------------|---------------------|-----------------------------|
| <b>Page 13: [45] Deleted</b> | <b>Richard Ryan</b> | <b>9/6/2007 11:40:00 AM</b> |
|------------------------------|---------------------|-----------------------------|

,

|                              |                     |                             |
|------------------------------|---------------------|-----------------------------|
| <b>Page 13: [45] Deleted</b> | <b>Richard Ryan</b> | <b>9/6/2007 11:42:00 AM</b> |
|------------------------------|---------------------|-----------------------------|

,

|                              |                     |                             |
|------------------------------|---------------------|-----------------------------|
| <b>Page 13: [45] Deleted</b> | <b>Richard Ryan</b> | <b>9/6/2007 11:42:00 AM</b> |
|------------------------------|---------------------|-----------------------------|

,

|                              |                     |                             |
|------------------------------|---------------------|-----------------------------|
| <b>Page 13: [45] Deleted</b> | <b>Richard Ryan</b> | <b>9/6/2007 11:42:00 AM</b> |
|------------------------------|---------------------|-----------------------------|

,



|                       |              |                      |
|-----------------------|--------------|----------------------|
| Page 13: [45] Deleted | Richard Ryan | 9/6/2007 11:42:00 AM |
|-----------------------|--------------|----------------------|

,

|                       |              |                      |
|-----------------------|--------------|----------------------|
| Page 13: [45] Deleted | Richard Ryan | 9/6/2007 11:42:00 AM |
|-----------------------|--------------|----------------------|

,

|                       |              |                      |
|-----------------------|--------------|----------------------|
| Page 13: [45] Deleted | Richard Ryan | 9/6/2007 11:42:00 AM |
|-----------------------|--------------|----------------------|

,

|                       |              |                      |
|-----------------------|--------------|----------------------|
| Page 13: [45] Deleted | Richard Ryan | 9/6/2007 11:42:00 AM |
|-----------------------|--------------|----------------------|

,

|                       |              |                      |
|-----------------------|--------------|----------------------|
| Page 13: [45] Deleted | Richard Ryan | 9/6/2007 11:42:00 AM |
|-----------------------|--------------|----------------------|

,

|                       |              |                      |
|-----------------------|--------------|----------------------|
| Page 13: [45] Deleted | Richard Ryan | 9/6/2007 11:42:00 AM |
|-----------------------|--------------|----------------------|

,

|                       |              |                      |
|-----------------------|--------------|----------------------|
| Page 13: [45] Deleted | Richard Ryan | 9/6/2007 11:42:00 AM |
|-----------------------|--------------|----------------------|

,

|                       |              |                      |
|-----------------------|--------------|----------------------|
| Page 13: [45] Deleted | Richard Ryan | 9/6/2007 11:42:00 AM |
|-----------------------|--------------|----------------------|

,

|                       |              |                      |
|-----------------------|--------------|----------------------|
| Page 13: [45] Deleted | Richard Ryan | 9/6/2007 11:42:00 AM |
|-----------------------|--------------|----------------------|

,

|                       |              |                      |
|-----------------------|--------------|----------------------|
| Page 13: [45] Deleted | Richard Ryan | 9/6/2007 11:42:00 AM |
|-----------------------|--------------|----------------------|

,

|                              |                     |                             |
|------------------------------|---------------------|-----------------------------|
| <b>Page 13: [45] Deleted</b> | <b>Richard Ryan</b> | <b>9/6/2007 11:42:00 AM</b> |
|------------------------------|---------------------|-----------------------------|

,

|                              |                     |                             |
|------------------------------|---------------------|-----------------------------|
| <b>Page 13: [45] Deleted</b> | <b>Richard Ryan</b> | <b>9/6/2007 11:42:00 AM</b> |
|------------------------------|---------------------|-----------------------------|

,

|                              |                     |                             |
|------------------------------|---------------------|-----------------------------|
| <b>Page 13: [45] Deleted</b> | <b>Richard Ryan</b> | <b>9/6/2007 11:42:00 AM</b> |
|------------------------------|---------------------|-----------------------------|

,

|                              |                     |                             |
|------------------------------|---------------------|-----------------------------|
| <b>Page 13: [45] Deleted</b> | <b>Richard Ryan</b> | <b>9/6/2007 11:42:00 AM</b> |
|------------------------------|---------------------|-----------------------------|

,

|                              |                     |                             |
|------------------------------|---------------------|-----------------------------|
| <b>Page 13: [45] Deleted</b> | <b>Richard Ryan</b> | <b>9/6/2007 11:42:00 AM</b> |
|------------------------------|---------------------|-----------------------------|

,

|                              |                     |                             |
|------------------------------|---------------------|-----------------------------|
| <b>Page 13: [45] Deleted</b> | <b>Richard Ryan</b> | <b>9/6/2007 11:42:00 AM</b> |
|------------------------------|---------------------|-----------------------------|

P

|                              |                     |                             |
|------------------------------|---------------------|-----------------------------|
| <b>Page 13: [45] Deleted</b> | <b>Richard Ryan</b> | <b>9/6/2007 11:43:00 AM</b> |
|------------------------------|---------------------|-----------------------------|

,

|                              |                     |                             |
|------------------------------|---------------------|-----------------------------|
| <b>Page 13: [45] Deleted</b> | <b>Richard Ryan</b> | <b>9/6/2007 11:43:00 AM</b> |
|------------------------------|---------------------|-----------------------------|

,

|                              |                     |                             |
|------------------------------|---------------------|-----------------------------|
| <b>Page 13: [45] Deleted</b> | <b>Richard Ryan</b> | <b>9/6/2007 11:43:00 AM</b> |
|------------------------------|---------------------|-----------------------------|

,

|                       |              |                      |
|-----------------------|--------------|----------------------|
| Page 13: [45] Deleted | Richard Ryan | 9/6/2007 11:43:00 AM |
|-----------------------|--------------|----------------------|

,

|                       |              |                      |
|-----------------------|--------------|----------------------|
| Page 13: [45] Deleted | Richard Ryan | 9/6/2007 11:43:00 AM |
|-----------------------|--------------|----------------------|

,

|                       |              |                      |
|-----------------------|--------------|----------------------|
| Page 13: [45] Deleted | Richard Ryan | 9/6/2007 11:43:00 AM |
|-----------------------|--------------|----------------------|

,

|                       |              |                      |
|-----------------------|--------------|----------------------|
| Page 13: [45] Deleted | Richard Ryan | 9/6/2007 11:40:00 AM |
|-----------------------|--------------|----------------------|

;

|                       |              |                      |
|-----------------------|--------------|----------------------|
| Page 13: [45] Deleted | Richard Ryan | 9/6/2007 11:43:00 AM |
|-----------------------|--------------|----------------------|

,

|                       |              |                      |
|-----------------------|--------------|----------------------|
| Page 13: [45] Deleted | Richard Ryan | 9/6/2007 11:40:00 AM |
|-----------------------|--------------|----------------------|

;

|                       |              |                      |
|-----------------------|--------------|----------------------|
| Page 13: [45] Deleted | Richard Ryan | 9/6/2007 11:43:00 AM |
|-----------------------|--------------|----------------------|

,

|                       |              |                      |
|-----------------------|--------------|----------------------|
| Page 13: [45] Deleted | Richard Ryan | 9/6/2007 11:40:00 AM |
|-----------------------|--------------|----------------------|

;

|                       |              |                      |
|-----------------------|--------------|----------------------|
| Page 13: [45] Deleted | Richard Ryan | 9/6/2007 11:43:00 AM |
|-----------------------|--------------|----------------------|

,

|                       |              |                      |
|-----------------------|--------------|----------------------|
| Page 13: [45] Deleted | Richard Ryan | 9/6/2007 11:40:00 AM |
|-----------------------|--------------|----------------------|

;

|                       |              |                      |
|-----------------------|--------------|----------------------|
| Page 13: [45] Deleted | Richard Ryan | 9/6/2007 11:43:00 AM |
|-----------------------|--------------|----------------------|

,

|                       |              |                      |
|-----------------------|--------------|----------------------|
| Page 13: [45] Deleted | Richard Ryan | 9/6/2007 11:40:00 AM |
|-----------------------|--------------|----------------------|

;

|                       |              |                      |
|-----------------------|--------------|----------------------|
| Page 13: [45] Deleted | Richard Ryan | 9/6/2007 11:43:00 AM |
|-----------------------|--------------|----------------------|

,

|                       |              |                      |
|-----------------------|--------------|----------------------|
| Page 13: [45] Deleted | Richard Ryan | 9/6/2007 11:40:00 AM |
|-----------------------|--------------|----------------------|

;

|                       |              |                      |
|-----------------------|--------------|----------------------|
| Page 13: [45] Deleted | Richard Ryan | 9/6/2007 11:43:00 AM |
|-----------------------|--------------|----------------------|

,

|                       |              |                      |
|-----------------------|--------------|----------------------|
| Page 13: [45] Deleted | Richard Ryan | 9/6/2007 11:43:00 AM |
|-----------------------|--------------|----------------------|

,

|                       |              |                      |
|-----------------------|--------------|----------------------|
| Page 13: [45] Deleted | Richard Ryan | 9/6/2007 11:43:00 AM |
|-----------------------|--------------|----------------------|

et

|                       |              |                      |
|-----------------------|--------------|----------------------|
| Page 13: [45] Deleted | Richard Ryan | 9/6/2007 11:43:00 AM |
|-----------------------|--------------|----------------------|

,

|                       |              |                      |
|-----------------------|--------------|----------------------|
| Page 13: [45] Deleted | Richard Ryan | 9/6/2007 11:40:00 AM |
|-----------------------|--------------|----------------------|

;

|                       |              |                      |
|-----------------------|--------------|----------------------|
| Page 13: [45] Deleted | Richard Ryan | 9/6/2007 11:43:00 AM |
|-----------------------|--------------|----------------------|

,

|                       |              |                      |
|-----------------------|--------------|----------------------|
| Page 13: [45] Deleted | Richard Ryan | 9/6/2007 11:43:00 AM |
|-----------------------|--------------|----------------------|

,

|                       |              |                      |
|-----------------------|--------------|----------------------|
| Page 13: [46] Deleted | Richard Ryan | 9/6/2007 11:40:00 AM |
|-----------------------|--------------|----------------------|

;

|                       |              |                      |
|-----------------------|--------------|----------------------|
| Page 13: [46] Deleted | Richard Ryan | 9/6/2007 11:44:00 AM |
|-----------------------|--------------|----------------------|

,

|                       |              |                     |
|-----------------------|--------------|---------------------|
| Page 13: [46] Deleted | Richard Ryan | 9/6/2007 1:26:00 PM |
|-----------------------|--------------|---------------------|

A

|                       |              |                      |
|-----------------------|--------------|----------------------|
| Page 13: [46] Deleted | Richard Ryan | 9/6/2007 11:44:00 AM |
|-----------------------|--------------|----------------------|

,

|                       |              |                      |
|-----------------------|--------------|----------------------|
| Page 13: [46] Deleted | Richard Ryan | 9/6/2007 11:44:00 AM |
|-----------------------|--------------|----------------------|

,

|                       |              |                      |
|-----------------------|--------------|----------------------|
| Page 13: [47] Deleted | Richard Ryan | 9/6/2007 11:44:00 AM |
|-----------------------|--------------|----------------------|

é

|                       |              |                      |
|-----------------------|--------------|----------------------|
| Page 13: [47] Deleted | Richard Ryan | 9/6/2007 11:44:00 AM |
|-----------------------|--------------|----------------------|

é

|                       |              |                      |
|-----------------------|--------------|----------------------|
| Page 13: [47] Deleted | Richard Ryan | 9/6/2007 11:44:00 AM |
|-----------------------|--------------|----------------------|

é

|                       |              |                      |
|-----------------------|--------------|----------------------|
| Page 13: [47] Deleted | Richard Ryan | 9/6/2007 11:44:00 AM |
|-----------------------|--------------|----------------------|

é

|                       |              |                      |
|-----------------------|--------------|----------------------|
| Page 13: [47] Deleted | Richard Ryan | 9/6/2007 11:44:00 AM |
|-----------------------|--------------|----------------------|

é

|                       |              |                      |
|-----------------------|--------------|----------------------|
| Page 13: [47] Deleted | Richard Ryan | 9/6/2007 11:44:00 AM |
|-----------------------|--------------|----------------------|

é

|                       |              |                      |
|-----------------------|--------------|----------------------|
| Page 13: [47] Deleted | Richard Ryan | 9/6/2007 11:44:00 AM |
|-----------------------|--------------|----------------------|

é

|                       |        |                      |
|-----------------------|--------|----------------------|
| Page 14: [48] Deleted | VIVIER | 10/3/2007 5:19:00 PM |
|-----------------------|--------|----------------------|

A solution of lithium aluminium hydride in ether (1M/THF, 1.

|                       |        |                      |
|-----------------------|--------|----------------------|
| Page 14: [49] Deleted | VIVIER | 10/3/2007 5:19:00 PM |
|-----------------------|--------|----------------------|

2 mmol) was added dropwise at – 90 °C under a nitrogen atmosphere to a solution of 8  
(1 eq, 0.

|                       |        |                      |
|-----------------------|--------|----------------------|
| Page 14: [50] Deleted | VIVIER | 10/3/2007 5:19:00 PM |
|-----------------------|--------|----------------------|

17 mmol, 130 mg) in anhydrous THF (5 mL). The mixture was stirred for 2 h 30 min  
and then

|                       |        |                      |
|-----------------------|--------|----------------------|
| Page 14: [51] Deleted | VIVIER | 10/3/2007 5:19:00 PM |
|-----------------------|--------|----------------------|

to 0 °C. The reaction was quenched by

|                       |        |                      |
|-----------------------|--------|----------------------|
| Page 14: [52] Deleted | VIVIER | 10/3/2007 5:19:00 PM |
|-----------------------|--------|----------------------|

lithium aluminium hydride was eliminated by the Mihailovic method. The resulting crude reaction mixture was extracted with  $\text{CH}_2\text{Cl}_2$  (2 ×

|                       |        |                      |
|-----------------------|--------|----------------------|
| Page 14: [53] Deleted | VIVIER | 10/3/2007 5:19:00 PM |
|-----------------------|--------|----------------------|

50 mL). The combined organic layers were dried over  $\text{MgSO}_4$ , concentrated under vacuum and

|                       |        |                      |
|-----------------------|--------|----------------------|
| Page 14: [54] Deleted | VIVIER | 10/3/2007 5:19:00 PM |
|-----------------------|--------|----------------------|

purified by flash chromatography (aluminium oxide,  $\text{CH}_2\text{Cl}_2$ /gradient of MeOH 2 up to 3 %) to

|                       |        |                      |
|-----------------------|--------|----------------------|
| Page 14: [55] Deleted | VIVIER | 10/3/2007 5:19:00 PM |
|-----------------------|--------|----------------------|

1 mg of **12** (yield: 48%): yellow solid; mp > 200°C

|                       |              |                      |
|-----------------------|--------------|----------------------|
| Page 14: [56] Deleted | Richard Ryan | 9/6/2007 11:40:00 AM |
|-----------------------|--------------|----------------------|

;

|                       |              |                      |
|-----------------------|--------------|----------------------|
| Page 14: [56] Deleted | Richard Ryan | 9/6/2007 11:46:00 AM |
|-----------------------|--------------|----------------------|

,

|                       |              |                      |
|-----------------------|--------------|----------------------|
| Page 14: [56] Deleted | Richard Ryan | 9/6/2007 11:40:00 AM |
|-----------------------|--------------|----------------------|

;

|                       |              |                      |
|-----------------------|--------------|----------------------|
| Page 14: [56] Deleted | Richard Ryan | 9/6/2007 11:46:00 AM |
|-----------------------|--------------|----------------------|

,

|                       |              |                      |
|-----------------------|--------------|----------------------|
| Page 14: [56] Deleted | Richard Ryan | 9/6/2007 11:40:00 AM |
|-----------------------|--------------|----------------------|

;

|                       |              |                      |
|-----------------------|--------------|----------------------|
| Page 14: [56] Deleted | Richard Ryan | 9/6/2007 11:46:00 AM |
|-----------------------|--------------|----------------------|

,

|                       |              |                      |
|-----------------------|--------------|----------------------|
| Page 14: [56] Deleted | Richard Ryan | 9/6/2007 11:46:00 AM |
|-----------------------|--------------|----------------------|

et

|                       |              |                      |
|-----------------------|--------------|----------------------|
| Page 14: [56] Deleted | Richard Ryan | 9/6/2007 11:40:00 AM |
|-----------------------|--------------|----------------------|

;

|                       |              |                      |
|-----------------------|--------------|----------------------|
| Page 14: [56] Deleted | Richard Ryan | 9/6/2007 11:46:00 AM |
|-----------------------|--------------|----------------------|

,

|                       |              |                      |
|-----------------------|--------------|----------------------|
| Page 14: [56] Deleted | Richard Ryan | 9/6/2007 11:40:00 AM |
|-----------------------|--------------|----------------------|

;

|                       |              |                      |
|-----------------------|--------------|----------------------|
| Page 14: [56] Deleted | Richard Ryan | 9/6/2007 11:46:00 AM |
|-----------------------|--------------|----------------------|

,

|                       |              |                      |
|-----------------------|--------------|----------------------|
| Page 14: [56] Deleted | Richard Ryan | 9/6/2007 11:40:00 AM |
|-----------------------|--------------|----------------------|

;

|                       |              |                      |
|-----------------------|--------------|----------------------|
| Page 14: [56] Deleted | Richard Ryan | 9/6/2007 11:46:00 AM |
|-----------------------|--------------|----------------------|

,

|                       |              |                      |
|-----------------------|--------------|----------------------|
| Page 14: [56] Deleted | Richard Ryan | 9/6/2007 11:40:00 AM |
|-----------------------|--------------|----------------------|

;



|                       |              |                      |
|-----------------------|--------------|----------------------|
| Page 14: [56] Deleted | Richard Ryan | 9/6/2007 11:46:00 AM |
|-----------------------|--------------|----------------------|

,

|                       |              |                      |
|-----------------------|--------------|----------------------|
| Page 14: [56] Deleted | Richard Ryan | 9/6/2007 11:40:00 AM |
|-----------------------|--------------|----------------------|

.

|                       |              |                      |
|-----------------------|--------------|----------------------|
| Page 14: [56] Deleted | Richard Ryan | 9/6/2007 11:46:00 AM |
|-----------------------|--------------|----------------------|

,

|                       |              |                      |
|-----------------------|--------------|----------------------|
| Page 14: [56] Deleted | Richard Ryan | 9/6/2007 11:40:00 AM |
|-----------------------|--------------|----------------------|

.

|                       |              |                      |
|-----------------------|--------------|----------------------|
| Page 14: [56] Deleted | Richard Ryan | 9/6/2007 11:46:00 AM |
|-----------------------|--------------|----------------------|

,

|                       |              |                      |
|-----------------------|--------------|----------------------|
| Page 14: [56] Deleted | Richard Ryan | 9/6/2007 11:46:00 AM |
|-----------------------|--------------|----------------------|

,

|                       |              |                      |
|-----------------------|--------------|----------------------|
| Page 14: [56] Deleted | Richard Ryan | 9/6/2007 11:40:00 AM |
|-----------------------|--------------|----------------------|

.

|                       |              |                      |
|-----------------------|--------------|----------------------|
| Page 14: [56] Deleted | Richard Ryan | 9/6/2007 11:46:00 AM |
|-----------------------|--------------|----------------------|

,

|                       |              |                      |
|-----------------------|--------------|----------------------|
| Page 14: [56] Deleted | Richard Ryan | 9/6/2007 11:40:00 AM |
|-----------------------|--------------|----------------------|

.

|                       |              |                      |
|-----------------------|--------------|----------------------|
| Page 14: [56] Deleted | Richard Ryan | 9/6/2007 11:46:00 AM |
|-----------------------|--------------|----------------------|

,

|                       |              |                      |
|-----------------------|--------------|----------------------|
| Page 14: [56] Deleted | Richard Ryan | 9/6/2007 11:40:00 AM |
|-----------------------|--------------|----------------------|

;

|                       |              |                      |
|-----------------------|--------------|----------------------|
| Page 14: [56] Deleted | Richard Ryan | 9/6/2007 11:46:00 AM |
|-----------------------|--------------|----------------------|

,

|                       |              |                      |
|-----------------------|--------------|----------------------|
| Page 14: [56] Deleted | Richard Ryan | 9/6/2007 11:46:00 AM |
|-----------------------|--------------|----------------------|

,

|                       |              |                      |
|-----------------------|--------------|----------------------|
| Page 14: [56] Deleted | Richard Ryan | 9/6/2007 11:46:00 AM |
|-----------------------|--------------|----------------------|

,

|                       |              |                      |
|-----------------------|--------------|----------------------|
| Page 14: [56] Deleted | Richard Ryan | 9/6/2007 11:46:00 AM |
|-----------------------|--------------|----------------------|

,

|                       |              |                      |
|-----------------------|--------------|----------------------|
| Page 14: [56] Deleted | Richard Ryan | 9/6/2007 11:40:00 AM |
|-----------------------|--------------|----------------------|

;

|                       |              |                      |
|-----------------------|--------------|----------------------|
| Page 14: [56] Deleted | Richard Ryan | 9/6/2007 11:46:00 AM |
|-----------------------|--------------|----------------------|

,

|                       |              |                      |
|-----------------------|--------------|----------------------|
| Page 14: [56] Deleted | Richard Ryan | 9/6/2007 11:46:00 AM |
|-----------------------|--------------|----------------------|

,

|                       |              |                      |
|-----------------------|--------------|----------------------|
| Page 14: [56] Deleted | Richard Ryan | 9/6/2007 11:47:00 AM |
|-----------------------|--------------|----------------------|

,

|                       |              |                      |
|-----------------------|--------------|----------------------|
| Page 14: [56] Deleted | Richard Ryan | 9/6/2007 11:47:00 AM |
|-----------------------|--------------|----------------------|

,

|                       |              |                      |
|-----------------------|--------------|----------------------|
| Page 14: [56] Deleted | Richard Ryan | 9/6/2007 11:47:00 AM |
|-----------------------|--------------|----------------------|

,

|                       |              |                      |
|-----------------------|--------------|----------------------|
| Page 14: [56] Deleted | Richard Ryan | 9/6/2007 11:47:00 AM |
|-----------------------|--------------|----------------------|

,

|                       |              |                      |
|-----------------------|--------------|----------------------|
| Page 14: [56] Deleted | Richard Ryan | 9/6/2007 11:47:00 AM |
|-----------------------|--------------|----------------------|

,

|                       |              |                      |
|-----------------------|--------------|----------------------|
| Page 14: [56] Deleted | Richard Ryan | 9/6/2007 11:47:00 AM |
|-----------------------|--------------|----------------------|

,

|                       |              |                      |
|-----------------------|--------------|----------------------|
| Page 14: [56] Deleted | Richard Ryan | 9/6/2007 11:47:00 AM |
|-----------------------|--------------|----------------------|

,

|                       |              |                      |
|-----------------------|--------------|----------------------|
| Page 14: [56] Deleted | Richard Ryan | 9/6/2007 11:47:00 AM |
|-----------------------|--------------|----------------------|

,

|                       |              |                      |
|-----------------------|--------------|----------------------|
| Page 14: [56] Deleted | Richard Ryan | 9/6/2007 11:47:00 AM |
|-----------------------|--------------|----------------------|

,

|                       |              |                      |
|-----------------------|--------------|----------------------|
| Page 14: [56] Deleted | Richard Ryan | 9/6/2007 11:47:00 AM |
|-----------------------|--------------|----------------------|

,

|                       |              |                      |
|-----------------------|--------------|----------------------|
| Page 14: [56] Deleted | Richard Ryan | 9/6/2007 11:47:00 AM |
|-----------------------|--------------|----------------------|

,

|                       |              |                      |
|-----------------------|--------------|----------------------|
| Page 14: [56] Deleted | Richard Ryan | 9/6/2007 11:47:00 AM |
|-----------------------|--------------|----------------------|

,

|                       |              |                      |
|-----------------------|--------------|----------------------|
| Page 14: [56] Deleted | Richard Ryan | 9/6/2007 11:47:00 AM |
|-----------------------|--------------|----------------------|

,

|                       |              |                      |
|-----------------------|--------------|----------------------|
| Page 14: [56] Deleted | Richard Ryan | 9/6/2007 11:47:00 AM |
|-----------------------|--------------|----------------------|

,

|                       |              |                      |
|-----------------------|--------------|----------------------|
| Page 14: [56] Deleted | Richard Ryan | 9/6/2007 11:47:00 AM |
|-----------------------|--------------|----------------------|

,

|                       |              |                      |
|-----------------------|--------------|----------------------|
| Page 14: [56] Deleted | Richard Ryan | 9/6/2007 11:47:00 AM |
|-----------------------|--------------|----------------------|

u

|                       |              |                      |
|-----------------------|--------------|----------------------|
| Page 14: [56] Deleted | Richard Ryan | 9/6/2007 11:47:00 AM |
|-----------------------|--------------|----------------------|

,

|                       |              |                      |
|-----------------------|--------------|----------------------|
| Page 14: [56] Deleted | Richard Ryan | 9/6/2007 11:47:00 AM |
|-----------------------|--------------|----------------------|

u

|                       |              |                      |
|-----------------------|--------------|----------------------|
| Page 14: [56] Deleted | Richard Ryan | 9/6/2007 11:47:00 AM |
|-----------------------|--------------|----------------------|

,

|                       |              |                      |
|-----------------------|--------------|----------------------|
| Page 14: [56] Deleted | Richard Ryan | 9/6/2007 11:47:00 AM |
|-----------------------|--------------|----------------------|

,

|                       |              |                      |
|-----------------------|--------------|----------------------|
| Page 14: [56] Deleted | Richard Ryan | 9/6/2007 11:47:00 AM |
|-----------------------|--------------|----------------------|

,

|                       |              |                      |
|-----------------------|--------------|----------------------|
| Page 14: [56] Deleted | Richard Ryan | 9/6/2007 11:40:00 AM |
|-----------------------|--------------|----------------------|

,

|                       |              |                      |
|-----------------------|--------------|----------------------|
| Page 14: [56] Deleted | Richard Ryan | 9/6/2007 11:47:00 AM |
|-----------------------|--------------|----------------------|

,

|                       |              |                      |
|-----------------------|--------------|----------------------|
| Page 14: [56] Deleted | Richard Ryan | 9/6/2007 11:48:00 AM |
|-----------------------|--------------|----------------------|

,

|                       |              |                      |
|-----------------------|--------------|----------------------|
| Page 14: [56] Deleted | Richard Ryan | 9/6/2007 11:48:00 AM |
|-----------------------|--------------|----------------------|

,

|                       |              |                      |
|-----------------------|--------------|----------------------|
| Page 14: [56] Deleted | Richard Ryan | 9/6/2007 11:48:00 AM |
|-----------------------|--------------|----------------------|

,

|                       |              |                      |
|-----------------------|--------------|----------------------|
| Page 14: [56] Deleted | Richard Ryan | 9/6/2007 11:48:00 AM |
|-----------------------|--------------|----------------------|

,

|                       |              |                      |
|-----------------------|--------------|----------------------|
| Page 14: [56] Deleted | Richard Ryan | 9/6/2007 11:48:00 AM |
|-----------------------|--------------|----------------------|

,

|                       |              |                      |
|-----------------------|--------------|----------------------|
| Page 14: [56] Deleted | Richard Ryan | 9/6/2007 11:48:00 AM |
|-----------------------|--------------|----------------------|

,

|                       |              |                      |
|-----------------------|--------------|----------------------|
| Page 14: [56] Deleted | Richard Ryan | 9/6/2007 11:48:00 AM |
|-----------------------|--------------|----------------------|

et

|                       |              |                      |
|-----------------------|--------------|----------------------|
| Page 14: [56] Deleted | Richard Ryan | 9/6/2007 11:48:00 AM |
|-----------------------|--------------|----------------------|

,

|                       |              |                      |
|-----------------------|--------------|----------------------|
| Page 14: [56] Deleted | Richard Ryan | 9/6/2007 11:48:00 AM |
|-----------------------|--------------|----------------------|

,

|                       |              |                      |
|-----------------------|--------------|----------------------|
| Page 14: [56] Deleted | Richard Ryan | 9/6/2007 11:48:00 AM |
|-----------------------|--------------|----------------------|

et

|                       |              |                      |
|-----------------------|--------------|----------------------|
| Page 14: [56] Deleted | Richard Ryan | 9/6/2007 11:40:00 AM |
|-----------------------|--------------|----------------------|

;

|                       |              |                      |
|-----------------------|--------------|----------------------|
| Page 14: [56] Deleted | Richard Ryan | 9/6/2007 11:48:00 AM |
|-----------------------|--------------|----------------------|

,

|                       |              |                     |
|-----------------------|--------------|---------------------|
| Page 14: [56] Deleted | Richard Ryan | 9/6/2007 1:26:00 PM |
|-----------------------|--------------|---------------------|

A

|                       |              |                      |
|-----------------------|--------------|----------------------|
| Page 14: [57] Deleted | Richard Ryan | 9/6/2007 11:48:00 AM |
|-----------------------|--------------|----------------------|

é

|                       |              |                      |
|-----------------------|--------------|----------------------|
| Page 14: [57] Deleted | Richard Ryan | 9/6/2007 11:48:00 AM |
|-----------------------|--------------|----------------------|

é

|                       |              |                      |
|-----------------------|--------------|----------------------|
| Page 14: [57] Deleted | Richard Ryan | 9/6/2007 11:48:00 AM |
|-----------------------|--------------|----------------------|

é

|                       |              |                      |
|-----------------------|--------------|----------------------|
| Page 14: [57] Deleted | Richard Ryan | 9/6/2007 11:48:00 AM |
|-----------------------|--------------|----------------------|

é

|                       |              |                      |
|-----------------------|--------------|----------------------|
| Page 14: [57] Deleted | Richard Ryan | 9/6/2007 11:48:00 AM |
|-----------------------|--------------|----------------------|

é

|                       |              |                      |
|-----------------------|--------------|----------------------|
| Page 14: [57] Deleted | Richard Ryan | 9/6/2007 11:48:00 AM |
|-----------------------|--------------|----------------------|

é

|                       |              |                      |
|-----------------------|--------------|----------------------|
| Page 14: [57] Deleted | Richard Ryan | 9/6/2007 11:48:00 AM |
|-----------------------|--------------|----------------------|

é

|                       |              |                      |
|-----------------------|--------------|----------------------|
| Page 14: [57] Deleted | Richard Ryan | 9/6/2007 11:48:00 AM |
|-----------------------|--------------|----------------------|

é

|                       |              |                      |
|-----------------------|--------------|----------------------|
| Page 14: [57] Deleted | Richard Ryan | 9/6/2007 11:48:00 AM |
|-----------------------|--------------|----------------------|

é

|                       |              |                      |
|-----------------------|--------------|----------------------|
| Page 14: [58] Deleted | Richard Ryan | 9/6/2007 11:49:00 AM |
|-----------------------|--------------|----------------------|

,

|                       |              |                      |
|-----------------------|--------------|----------------------|
| Page 14: [58] Deleted | Richard Ryan | 9/6/2007 11:40:00 AM |
|-----------------------|--------------|----------------------|

;

|                       |              |                      |
|-----------------------|--------------|----------------------|
| Page 14: [58] Deleted | Richard Ryan | 9/6/2007 11:49:00 AM |
|-----------------------|--------------|----------------------|

i

|                       |              |                      |
|-----------------------|--------------|----------------------|
| Page 14: [58] Deleted | Richard Ryan | 9/6/2007 11:49:00 AM |
|-----------------------|--------------|----------------------|

sodium iodide

Page 14: [58] Deleted

Richard Ryan

9/6/2007 11:49:00 AM

0.1 N

Page 14: [58] Deleted

Richard Ryan

9/6/2007 11:49:00 AM

Page 14: [58] Deleted

Richard Ryan

9/6/2007 11:49:00 AM

basified

Page 14: [58] Deleted

Richard Ryan

9/6/2007 1:27:00 PM

Page 14: [58] Deleted

Richard Ryan

9/6/2007 11:49:00 AM

afford

Page 14: [58] Deleted

Richard Ryan

9/6/2007 11:49:00 AM

Page 14: [58] Deleted

Richard Ryan

9/6/2007 10:53:00 AM

Rf

Page 14: [59] Deleted

Richard Ryan

9/6/2007 11:50:00 AM

,

Page 14: [59] Deleted

Richard Ryan

9/6/2007 11:50:00 AM

A



|                       |              |                      |
|-----------------------|--------------|----------------------|
| Page 14: [59] Deleted | Richard Ryan | 9/6/2007 11:50:00 AM |
|-----------------------|--------------|----------------------|

e

|                       |              |                      |
|-----------------------|--------------|----------------------|
| Page 14: [59] Deleted | Richard Ryan | 9/6/2007 11:55:00 AM |
|-----------------------|--------------|----------------------|

Tr

|                       |        |                      |
|-----------------------|--------|----------------------|
| Page 14: [60] Deleted | VIVIER | 10/3/2007 5:20:00 PM |
|-----------------------|--------|----------------------|

thyl-1-oxopentan-2-ylamino)-1-oxopentan-2-ylamino)-1-oxopentan-2-yl)te

|                       |        |                      |
|-----------------------|--------|----------------------|
| Page 14: [61] Deleted | VIVIER | 10/3/2007 5:20:00 PM |
|-----------------------|--------|----------------------|

phthalamide ([<sup>125</sup>I]-12)

To a solution of compound **10** (8 μmol, 5.

|                         |        |                       |
|-------------------------|--------|-----------------------|
| Page 17: [62] Formatted | VIVIER | 10/4/2007 10:03:00 AM |
|-------------------------|--------|-----------------------|

Formatted

|                       |              |                      |
|-----------------------|--------------|----------------------|
| Page 17: [63] Deleted | Richard Ryan | 9/6/2007 11:37:00 AM |
|-----------------------|--------------|----------------------|

A

|                       |              |                      |
|-----------------------|--------------|----------------------|
| Page 17: [63] Deleted | Richard Ryan | 9/6/2007 11:36:00 AM |
|-----------------------|--------------|----------------------|

.

|                       |              |                      |
|-----------------------|--------------|----------------------|
| Page 17: [64] Deleted | Richard Ryan | 9/6/2007 11:37:00 AM |
|-----------------------|--------------|----------------------|

,

|                       |              |                      |
|-----------------------|--------------|----------------------|
| Page 17: [64] Deleted | Richard Ryan | 9/6/2007 11:37:00 AM |
|-----------------------|--------------|----------------------|

,
